1 **Title:** Mitochondrial-Encoded Peptide MOTS-c is an Exercise-Induced Regulator of Aging  
2 Metabolic Homeostasis and Physical Capacity

3

4

5 **Authors:** Joseph C. Reynolds<sup>1</sup>, Rochelle W. Lai<sup>1</sup>, Jonathan S.T. Woodhead<sup>5,6</sup>, James H. Joly<sup>4</sup>,  
6 Cameron J. Mitchell<sup>7,9</sup>, David Cameron-Smith<sup>7</sup>, Ryan Lu<sup>1</sup>, Pinchas Cohen<sup>1,2</sup>, Nicholas A.  
7 Graham<sup>2,4</sup>, Bérénice A. Benayoun<sup>1,2,3</sup>, Troy L. Merry<sup>5,6</sup>, Changhan Lee<sup>1,2,8\*</sup>.

8

9 <sup>1</sup> Leonard Davis School of Gerontology, University of Southern California, Los Angeles, CA  
10 90089.

11 <sup>2</sup> USC Norris Comprehensive Cancer Center, Los Angeles, CA 90089.

12 <sup>3</sup> USC Stem Cell Initiative, Los Angeles, CA 90089.

13 <sup>4</sup> USC Mork Family Department of Chemical Engineering and Materials Science, Los Angeles,  
14 CA 90089.

15 <sup>5</sup> Discipline of Nutrition, Faculty of Medical and Health Sciences, The University of Auckland,  
16 Auckland, New Zealand

17 <sup>6</sup>Maurice Wilkins Centre for Molecular Biodiscovery, The University of Auckland, Auckland,  
18 New Zealand

19 <sup>7</sup>Liggins Institute, The University of Auckland, Auckland, New Zealand

20 <sup>8</sup>Biomedical Science, Graduate School, Ajou University, Suwon 16499, Korea.

21 <sup>9</sup>School of Kinesiology, University of British Columbia, Vancouver, BC, Canada V6T 1Z3

22

23 \*corresponding author: [changhan.lee@usc.edu](mailto:changhan.lee@usc.edu)

24

25

26

27

28

29

30 **Abstract:**

31 Healthy aging can be promoted by enhancing metabolic fitness and physical capacity (1, 2).  
32 Mitochondria are chief metabolic organelles with strong implications in aging (3-8). In addition to  
33 their prominent role in bioenergetics, mitochondria also coordinate broad physiological functions  
34 by communicating to other cellular compartments or distal cells using multiple factors (9, 10),  
35 including peptides that are encoded within their own independent genome (11, 12). However, it is  
36 unknown if aging is actively regulated by factors encoded in the mitochondrial genome. MOTS-c  
37 is a mitochondrial-encoded peptide that regulates metabolic homeostasis (13, 14), in part, by  
38 translocating to the nucleus to regulate adaptive nuclear gene expression in response to cellular  
39 stress (15-17). Here, we report that MOTS-c is an exercise-induced mitochondrial-encoded peptide  
40 that significantly enhanced physical performance when administered to young (2 mo.), middle-  
41 aged (12 mo.), and old (22 mo.) mice. In humans, we found that endogenous MOTS-c levels  
42 significantly increased in response to exercise in skeletal muscle (11.9-fold) and in circulation  
43 (1.5-fold). Systemic MOTS-c treatment in mice significantly enhanced the performance on a  
44 treadmill of all age groups (~2-fold). MOTS-c regulated (i) nuclear genes, including those related  
45 to metabolism and protein homeostasis, (ii) glucose and amino acid metabolism in skeletal muscle,  
46 and (iii) myoblast adaptation to metabolic stress. Late-life (23.5 mo.) initiated intermittent MOTS-  
47 c treatment (3x/week) improved physical capacity and trended towards increasing lifespan. Our  
48 data indicate that aging is regulated by genes that are encoded not only in the nuclear genome (18,  
49 19), but also in the mitochondrial genome. Considering that aging is the major risk factor for  
50 multiple chronic diseases (20, 21), our study provides new grounds for further investigation into  
51 mitochondrial-encoded regulators of healthy lifespan.

52

53

54 **Main Text:**

55 Organismal fitness requires continuous adaptive cellular stress responses to the ever-shifting  
56 internal and external environment. The capacity to maintain metabolic homeostasis declines with  
57 age, which impedes parenchymal function and ultimately diminishes physical capacity.  
58 Mitochondria not only produce the bulk of cellular energy, but also coordinate adaptive cellular  
59 homeostasis by dynamically communicating to the nucleus (9) and other subcellular compartments

60 (22). Mitochondrial communication is mediated by multiple nuclear-encoded proteins, transient  
61 molecules, and mitochondrial metabolites (23).

62 Mitochondria possess a distinct circular genome that has been traditionally known to host only 13  
63 protein-coding genes. However, short open reading frames (sORFs) encoded in the mitochondrial  
64 genome have been recently identified. Such sORFs produce bioactive peptides, collectively  
65 referred to as mitochondrial-derived peptides (MDPs), with broad physiological functions (11, 12).  
66 MOTS-c (mitochondrial ORF of the 12S rDNA type-c) is an MDP that promotes metabolic  
67 homeostasis, in part, via AMPK (13, 14) and by directly regulating adaptive nuclear gene  
68 expression following nuclear translocation (15, 16). MOTS-c expression is age-dependent and  
69 detected in multiple tissues, including skeletal muscle, and in circulation (13, 14, 24), thus it has  
70 been dubbed a “mitochondrial hormone” (14) or “mitokine” (25, 26). In fact, systemic MOTS-c  
71 treatment reversed diet-induced obesity and diet- and age-dependent insulin resistance in mice  
72 (13). We tested if MOTS-c functions as a mitochondrial-encoded regulator of physical capacity  
73 and performance (2, 27, 28) in young (2 mo.), middle-aged (12 mo.), and old (22 mo.) mice.

74 To determine if endogenous MOTS-c responds to physical exertion, and thus may be involved in  
75 driving adaptation to enhance physical capacity, we collected skeletal muscle and plasma from  
76 sedentary healthy young male volunteers ( $24.5 \pm 3.7$  years old and BMI  $24.1 \pm 2.1$ ) that exercised  
77 on a stationary bicycle (Fig. 1A). Samples were collected before, during (plasma only), and after  
78 exercise and following a 4-hour rest. Western blotting revealed that endogenous MOTS-c levels  
79 in skeletal muscle significantly increased after exercise (11.9-fold) and remained elevated after a  
80 4-hour rest (18.9-fold) (Fig. 1B, C). ELISA revealed that circulating endogenous MOTS-c levels  
81 also significantly increased during (1.6-fold) and after (1.5-fold) exercise, which then returned to  
82 baseline after 4 hours of resting (Fig. 1D, fig. S1). These findings suggest that exercise induces the  
83 expression of mitochondrial-encoded regulatory peptides in humans.

84 We next probed if MOTS-c functions as an exercise-induced mitochondrial signal that improves  
85 physical capacity by treating young mice (CD-1; outbred) daily with MOTS-c [5mg/kg/day;  
86 intraperitoneal injections (IP)] for 2 weeks. The rotarod performance test, whereby mice are placed  
87 on a rotating rod, revealed that daily MOTS-c significantly improved physical capacity (fig. S2A),  
88 but not grip strength (fig. S2B) in young mice. Because the rotarod test can also be affected by

89 cognitive capacity, we assessed learning and memory using the Barnes maze and found no  
90 improvement (fig. S2C, D).

91 A treadmill running test confirmed that MOTS-c treatment can enhance physical performance.  
92 Because MOTS-c is regulator of metabolic homeostasis that prevented high-fat diet (HFD)-  
93 induced obesity and insulin resistance (13), we tested if MOTS-c also improved running  
94 performance under metabolic (dietary) stress. We fed young mice (CD-1) a HFD (60% calories  
95 from fat) and treated them with 2 doses of MOTS-c (5 and 15 mg/kg/day; IP) (fig. S3A). Mice on  
96 the higher dose of MOTS-c showed significantly superior running capacity following 10 days of  
97 treatment (Fig. 2A-C), but not 7 days of treatment (fig. S4A). We progressively increased the  
98 treadmill speed to test both endurance and speed. The final stage, which required mice to sprint  
99 (23m/s), was reached by 100% of mice on the higher dose of MOTS-c, but only 16.6% in the lower  
100 dose and control (vehicle) groups (Fig. 2D). Body composition analysis using a time-domain NMR  
101 analyzer revealed that both doses of MOTS-c significantly retarded fat gain and that the high dose  
102 significantly increased lean mass in young mice (CD-1) (fig. S5A-C), in accord with prior reports  
103 (13).

104 In young CD-1 mice, we simultaneously initiated MOTS-c treatment and a HFD (fig. S3A). To  
105 test if MOTS-c can improve physical performance in mice that have been on a HFD, we fed young  
106 C57BL/6J mice a HFD, or a normal diet, for 2 weeks before initiating daily MOTS-c injections  
107 (15 mg/kg/day) for 2 weeks prior to a treadmill running test (fig. S3B). MOTS-c treatment  
108 significantly enhanced running performance on the treadmill regardless of the diet (Fig. 2E-G, fig.  
109 S4B). MOTS-c treatment enabled 25% of the young C57BL/6J mice to enter the final running  
110 stage (highest speed) on a normal diet, but none on a HFD (Fig. 2H). Consistent with our prior  
111 study (13), MOTS-c treatment curbed HFD-induced weight gain in C57BL/6J mice (fig. S5D),  
112 which was largely driven by reduced fat accumulation (fig. S5E), but not loss of lean mass (fig.  
113 S5F), as determined by an NMR-based body composition analysis. Further, targeted metabolomics  
114 revealed that MOTS-c treatment significantly regulated (i) glycolysis/PPP (pentose phosphate  
115 pathway) and (ii) amino acid metabolism (Fig. 2I, fig. S3B) in skeletal muscle, but not in liver,  
116 consistent with our previous study (13). Together, these data indicate that MOTS-c treatment can  
117 improve overall physical performance, in part, by targeting skeletal muscle metabolism in young  
118 mice.

119 Aging is accompanied by a progressive decline in mitochondrial function (1, 8) and loss of  
120 metabolic homeostasis, in which MOTS-c may play a role (2, 9). Aging is associated with reduced  
121 MOTS-c levels in certain tissues, including the skeletal muscle, and in circulation (13, 24). We  
122 previously showed that an acute one-week MOTS-c treatment reversed age-dependent insulin  
123 resistance in mouse skeletal muscle (13). Thus, we investigated if promoting metabolic  
124 homeostasis by MOTS-c treatment could reverse age-dependent decline in physical capacity.  
125 Middle-aged (12 mo.) and old (22 mo.) C57BL/6N mice were treated daily with MOTS-c (15  
126 mg/kg/day; IP) for 2 weeks, then subjected to a treadmill running test (Fig. 3A). Both middle-aged  
127 and old mice ran significantly longer following MOTS-c treatment (Fig. 3B). Old mice ran longer  
128 (2-fold) (Fig. 3C) and farther (2.16-fold) (Fig. 3D) when treated with MOTS-c. Further, MOTS-c  
129 enabled 17% of the old mice to enter the final running stage (highest speed), whereas none in the  
130 untreated group were successful (Fig. 3E). Notably, MOTS-c treatment enabled old mice to  
131 outperform untreated middle-aged mice, suggesting a more pervasive physical re-programming  
132 rather than just rejuvenation. Respiratory exchange ratio (RER), measured using a metabolic cage,  
133 indicates fuel preference (1.0: carbohydrates, 0.7: fat). “Metabolic flexibility”, which refers to the  
134 overall adaptive capacity to a shift in metabolic supply-demand equilibrium (e.g. exercise),  
135 declines with age (29, 30). Indeed, old mice relied on carbohydrates regardless of the time of day  
136 (Fig. 3F), whereas middle-aged mice, and MOTS-c-treated old mice, exhibited a circadian-  
137 dependent shift in fuel usage that favored fat during the daytime (Fig. 3F), coinciding with the  
138 low-feeding hours (fig. S6). Metabolomic analysis on skeletal muscle collected immediately post-  
139 exercise (a 30-minute run at a fixed moderate speed) in MOTS-c-treated (2 weeks) mice revealed  
140 that MOTS-c significantly regulated glycolysis and amino acid metabolism (Fig. 3G); the skeletal  
141 muscles of non-exercised mice did not show significant alterations in response to MOTS-c (fig.  
142 S7), suggesting that MOTS-c induces an adaptive metabolic response to exercise. To begin to  
143 understand the molecular mechanisms underlying the effects of MOTS-c, we performed RNA-seq  
144 analysis on the same skeletal muscles used for metabolomics. Although individual-to-individual  
145 variability was high, Gene Set Enrichment Analysis (GSEA) using the KEGG pathway database  
146 revealed that MOTS-c regulated processes related to (i) metabolism, including those known to be  
147 regulated by MOTS-c (e.g. AMPK signaling, glycolysis, and central carbon metabolism) (13, 15),  
148 and (ii) longevity (FDR < 15%; select pathways in Fig. 3H; full analysis in able S1). Gene  
149 Ontology Biological Process (GO\_BP) analysis revealed a broader range of processes, including

150 metabolism (lipid, carbohydrate, amino acid, and nucleotides), oxidative stress response, immune  
151 response, and nuclear transport (FDR < 15%; select pathways in fig. S8; full analysis in table S2),  
152 again, consistent with our previous studies (13, 15). The rotarod performance test confirmed that  
153 MOTS-c treatment improved physical capacity in old mice (fig. S9A), while learning and memory  
154 was not affected as determined using the Y-maze test (fig. S9B), consistent with our observations  
155 in young mice (fig. S2). Together, these data suggest that MOTS-c treatment can significantly  
156 improve physical capacity in old mice, in part, by regulating skeletal function and improving  
157 “metabolic flexibility”.

158 Age is the major risk factor for many chronic diseases and interventions that delay aging may  
159 extend healthy lifespan (20, 31-33). Anti-aging interventions that are applied later in life would be  
160 more translationally feasible compared to life-long treatments (34, 35). Building on the treadmill  
161 running tests, we tested if a late-life initiated (~24 mo.) intermittent (LLII) MOTS-c treatment  
162 (3x/week; 15mg/kg/day) would improve healthy lifespan (Fig. 3A). To assess healthspan, towards  
163 the end-of-life (>30 mo.), we performed a battery of physical tests to further probe the effect of  
164 MOTS-c on reversing age-dependent physical decline (Fig. 3A). LLII MOTS-c improved (i) grip  
165 strength (Fig. 4A), (ii) gait, assessed by stride length (Fig. 4B), and (iii) physical performance,  
166 assessed by a 60-second walking test (running was not possible at this age) (Fig. 4C). In humans,  
167 reduced stride length and walking capacity are strongly linked to mortality and morbidity (36).  
168 Together, these data indicate that LLII MOTS-c treatment improves physical capacity in old mice.

169 Independent lines of research have shown that MOTS-c is a mitochondrial-encoded metabolic  
170 regulator at the cellular and organismal level (13, 15, 24, 37-41). We posited that LLII MOTS-c  
171 treatment would cause metabolic reprogramming in old mice. Consistent with our previous report  
172 (13), non-fasting blood glucose was better maintained in LLII MOTS-c-treated old mice (30 mo.;  
173 Fig. 4D). Over course of their life, LLII MOTS-c-treated mice showed comparable body weight  
174 to their untreated counterparts (Fig. 4E, F) However, total food intake was significantly reduced  
175 (Fig. 4G, H, fig. S6), whereas total activity was significantly higher (fig. S10). Body composition  
176 analysis using a time-domain NMR analyzer revealed significant reduction of fat mass (Fig. 4I, J)  
177 and a modest increase in lean mass (Fig. 4K, L). The RER, measured using metabolic cages, at 30  
178 mo. revealed increased fat utilization, consistent with that obtained at ~23.5 mo. (Fig. 3F), but with  
179 a circadian shift (fig. S11); this is also consistent with reduced total fat mass (Fig. 4I, J, fig. S5B,

180 E) and increased lipid utilization (13, 41). Ultimately, LLII MOTS-c treatment showed a trend  
181 towards increased median (6.4%) and maximum (7.0%) lifespan and reduced hazard ratio (0.654);  
182  $P=0.05$  until 31.8 months (Fig. 4M). Larger cohorts will be needed to confirm the broader  
183 significance of MOTS-c treatment on overall longevity. These data suggest that LLII MOTS-c  
184 treatment improves overall physical capacity in old mice and may compress morbidity and increase  
185 healthspan.

186 Skeletal muscle must adapt to various exercise-induced challenges (42), including nutrient (*e.g.*  
187 metabolic supply-demand imbalance) (43), oxidative (44, 45), and heat stress (42, 46), which share  
188 mitochondria as a common denominator. Because MOTS-c enhanced cellular resistance against  
189 metabolic/oxidative stress (15), we tested if MOTS-c treatment improved skeletal muscle  
190 adaptation to metabolic stress using C2C12 mouse myoblast cells. Using crystal violet staining to  
191 determine cellular viability, we found that MOTS-c (10 $\mu$ M) treatment significantly protected  
192 C2C12 cells (~2-fold) from 48 hours of metabolic stress [glucose restriction (GR; 0.5 g/L) and  
193 serum deprivation (SD; 1% FBS)] (Fig. 5A). Next, we tested the replicative capacity of C2C12  
194 cells following prolonged metabolic stress as a functional marker of protection. C2C12 cells were  
195 metabolically stressed (GR/SD) for one week with daily MOTS-c (10 $\mu$ M) treatment, then  
196 replenished with complete medium for 2 days and stained with crystal violet. MOTS-c-treated  
197 C2C12 cells showed significantly enhanced proliferative capacity within 2 days (~6-fold) (Fig.  
198 5B). Because MOTS-c promotes fat utilization, which may underly its effect on “metabolic  
199 flexibility” (Figs. 3F, 4I, J, fig. S5) (13, 41, 47), we tested if MOTS-c-treated C2C12 cells could  
200 survive on lipids without glucose (0 g/L). As expected, most control cells died without glucose  
201 even with lipid supplementation, whereas MOTS-c treatment provided significant protection (~2-  
202 fold) (Fig. 5C). Real-time metabolic flux analysis revealed that MOTS-c treatment significantly  
203 increased lipid utilization capacity (Fig. 5D) and lipid-dependent glycolysis (fig. S12) in C2C12  
204 cells.

205 We previously reported that endogenous MOTS-c translocates to the nucleus to directly regulate  
206 adaptive nuclear gene expression in response to cellular stress (15). Using fluorescently labeled  
207 MOTS-c peptide (MOTS-c-FITC), we confirmed that exogenously treated MOTS-c also  
208 dynamically translocated to the nucleus in a time-dependent manner (Fig. 4E) (15), indicating a  
209 direct nuclear role. We performed RNA-seq on C2C12 cells treated with MOTS-c or vehicle

210 control (10 $\mu$ M) under GR/SD for 48 hours and found (i) clustering by treatment type using a  
211 principal component analysis (PCA) (Fig. 5F) and (ii) 69 genes that were differentially regulated  
212 at FDR < 5% (Fig. 5G). Further, using the STRING (Search Tool for the Retrieval of Interacting  
213 Genes/Proteins) database to assess putative changes in protein-protein interaction networks based  
214 on our RNA-seq results, we found that a cluster related to heat-shock responses were prominently  
215 regulated by MOTS-c in C2C12 cells under GR/SD; we also identified previously reported MOTS-  
216 c targets, including Atf3, Jun, Fos11, and Mafg (15) (Fig. 5H). Consistently, select GO\_BP analysis  
217 revealed protein regulation as a major target process of MOTS-c in myoblasts (select terms in fig.  
218 S13; full results in table S3). To identify common pathways in *in vitro* and *in vivo* models, we  
219 overlaid RNA-seq data from MOTS-c-treated (i) old mouse skeletal muscle and (ii) metabolically  
220 stressed (GR/SD) C2C12. Select GO\_BP analysis revealed several commonly targeted processes,  
221 including protein regulation, cellular metabolism, oxidative stress response, and nuclear transport  
222 (select terms in Fig. 5I; full results in table S4). Together, these data suggest that MOTS-c  
223 improves metabolic homeostasis/flexibility and protein homeostasis in skeletal muscle under  
224 exercise-induced stress conditions.

225 Our study shows that exercise induces mtDNA-encoded MOTS-c expression. MOTS-c treatment  
226 significantly (i) improved physical performance in young, middle-aged, and old mice, (ii)  
227 regulated skeletal muscle metabolism and gene expression, and (iii) enhanced adaptation to  
228 metabolic stress in C2C12 cells. Thus, it is plausible that the physiological role of exercise-induced  
229 MOTS-c is to promote adaptive responses to exercise-related stress conditions (*e.g.* metabolic  
230 imbalance and heat shock) in the skeletal muscle and maintain cellular homeostasis.

231 Mitochondria are strongly implicated in aging at multiple levels (1, 2, 6-8, 48). Here, we present  
232 evidence that the mitochondrial genome encodes for instructions to maintain physical capacity (*i.e.*  
233 performance and metabolism) during aging and thereby increase healthspan. MOTS-c treatment  
234 initiated in late-life, proximal to the age at which the lifespan curve rapidly descends for  
235 C57BL/6N mice, significantly delayed the onset of age-related physical disabilities, suggesting  
236 “compression of morbidity” in later life (49). Interestingly, an exceptionally long-lived Japanese  
237 population harbors a mitochondrial DNA (mtDNA) SNP (m.1382A>C) that yields a functional  
238 variant of MOTS-c (50, 51).



239 Our study shows that exogenously treated MOTS-c enters the nucleus and regulates nuclear gene  
240 expression, including those involved in heat shock response and metabolism. Thus, age-related  
241 gene networks are comprised of integrated factors encoded by both genomes, which entails a bi-  
242 genomic basis for the evolution of aging. Although the detailed molecular mechanism(s)  
243 underlying the functions of MOTS-c is an active field of research, we provide a “proof-of-  
244 principle” study that realizes the mitochondrial genome as a source for instructions that can  
245 regulate physical capacity and healthy aging.

246

247

## 248 **Materials and Methods**

### 249 Mouse Care

250 All animal work was performed in accordance with the University of Southern California (USC)  
251 Institutional Animal Care and Use Committee. MOTS-c (New England Peptide, USA) was  
252 administered daily at 5 or 15 mg/kg via intraperitoneal injections. 12-week old male CD-1  
253 (outbred) mice (Charles River, USA), 12-week old male C57BL/6J mice (Jackson Laboratory) and  
254 8- and 18-month old male C57BL/6N mice (National Institute on Aging; NIA) were obtained. All  
255 mice were fed either a HFD (60% calories from fat) or matching control diet (Research Diets,  
256 USA, #D12492 and D12450J, respectively). NIA mice were sufficiently acclimated for 4 months  
257 in our vivarium until they were considered middle-aged (12 mo.) and old (22 mo.) at the start of  
258 MOTS-c injections. Body weight and food consumption were recorded daily, while body  
259 composition was analyzed twice weekly using an LF90II time-domain NMR minispec (Bruker,  
260 USA). After eight weeks of injections (23.5 months of age), mice were transitioned to receive  
261 MOTS-c injections three times weekly. No live mouse was censored.

262

### 263 Physical Tests in Mice

264 *Running Test:* Prior to running training/testing, mice were acclimated to the stationary treadmill  
265 apparatus (TSE-Systems, USA) for ten minutes on two consecutive days (Days 1 and 2). Both the  
266 high intensity test and training protocols were adapted from previously published protocols (52).  
267 Running training was given twice on non-consecutive days and consisted of a fixed speed run of  
268 10 m/min for 20 minutes (Days 4 and 6) on a level treadmill. The treadmill test on Day 10 consisted  
269 of three stages. Stage one was a five-minute run at 13 m/min. For the next five minutes, the speed  
270 was increased by 1 m/min. The mice run at a fixed speed of 18 m/min for the next 30 minutes.  
271 Finally, after 40 minutes of total run time, the running speed is increased to 23 m/min until  
272 exhaustion is reached. All training and testing were done on a level treadmill. Mice resting on the  
273 platform were gently prodded to encourage re-engagement. Any mouse that resisted prodding and  
274 remained on the platform for 30 seconds was considered to be exhausted, and time was recorded.

275 *Walking Test:* When the mice reached 30 months of age, they were no longer capable of performing  
276 the same treadmill routine. We developed a measure of mobility in the aged mice consisting of a

277 60 second walking test. The treadmill was set at 13 m/min for 60 seconds. We recorded whether  
278 the mouse was able to walk, or not, on the treadmill for 60 seconds, with gentle prodding as needed.  
279 Mice remaining on the stationary platform, refusing to engage in the treadmill walking, for more  
280 than five seconds were considered to have failed the test.

281 *Rotarod*: The Rotarod test was performed by placing the mice on the apparatus (TSE-Systems),  
282 all facing the opposite direction of rotation. The initial speed of rotation was 24 rpm and  
283 accelerated at 1 rpm every 10 seconds. Time to fall was recorded for each mouse, and three trials  
284 per mouse was run. Mice received no less than five minutes of recovery time between trials.

285 *Grip Strength*: We measured grip strength using a horizontal bar connected to the grip strength  
286 meter (TSE-Systems) as a high precision force sensor for the forelimbs. After allowing the mouse  
287 to properly grip the bar they were firmly and quickly pulled in the opposite direction. Only trials  
288 where the mouse released its paws from the bar simultaneously were counted as successful. Mice  
289 underwent three trials, with at least 30 seconds recovery time between trials.

290 *Gait Analysis*: To perform gait analysis, we applied a different color of non-toxic ink (BLICK®,  
291 USA) to the front and hind paw of the mice to record footprints. Barriers were constructed to guide  
292 the mice to walk straight on the recording paper. The home cage was kept at the end of the  
293 recording paper to encourage completion of the test. Only trials in which the mouse made a  
294 continuous, direct path to its home cage were counted. Stride length was measured as the average  
295 forward movement of three full strides as previously described(53).

296 *Cognitive tests*:

297 *Y-maze tests* were performed as previously described (54). Briefly, mice were placed in a maze  
298 consisting of three arms equally spaced 120° apart. Mice were placed in one arm of the maze and  
299 allowed to freely explore the maze for five minutes. Total arm entries and arm choices were  
300 recorded for each mouse. An arm entry was defined as a mouse having both front and hind paws  
301 entering the arm fully. Percent alternations was defined as an arm choice differing from the  
302 previous two compared to the total number of alternation opportunities.

303 *Barnes maze tests* were performed as previously described (54). 12-week old male CD-1 mice  
304 were tested twice daily for 7 days. Mice were placed in a start chamber in the middle of the maze  
305 and allowed to habituate (30 seconds), then the mouse was released to explore the maze and find

306 the escape box (EB). Latency (time to enter the EB) and number of errors (nose pokes and head  
307 deflections over false holes) were recorded. A maximum of 2 minutes was allowed for each trial.

308

### 309 *In Vivo* Metabolism Assessment

310 *Metabolic Cages:* Metabolic activity in mice was measured using the PhenoMaster system (TSE-  
311 Systems) equipped to detect indirect calorimetry, measure food and water intake, and monitor  
312 activity. Prior to metabolic analysis, mice were housed 3-4 per cage in a facility with a 12:12 hour  
313 light- dark cycle (light period 0600-1800) at 24°C. Food and water were available *ad libitum*. For  
314 metabolic assessment, mice were moved into individual PhenoMaster cages in an isolated room  
315 under the same environmental conditions. Mice were automatically monitored for 36 hours to record  
316 physiological parameters. To measure O<sub>2</sub> intake and CO<sub>2</sub> production, gas sensors were calibrated  
317 prior to the study using primary gas standards of known concentrations of O<sub>2</sub>, CO<sub>2</sub>, and N<sub>2</sub>. Room  
318 air was passed through the animal chambers at a rate of 0.5 L/min. Exhaust air from individual  
319 cages were sampled at 30-minute intervals for 3 minutes. Sample air was passed through sensors  
320 to determine oxygen consumption (VO<sub>2</sub>) and carbon dioxide production (VCO<sub>2</sub>). The respiratory  
321 exchange ratio (RER) was calculated as the ratio of carbon dioxide produced to oxygen  
322 consumption. The PhenoMaster system allows for activity monitoring using a triple beam IR  
323 technology system. Breaking the IR beams through movement was considered a “count”. The  
324 three-beam system allows XYZ monitoring that considers both ambulatory activity around the  
325 cage as well as rearing activity. All data are expressed as the mean of three 24-hour acquisition  
326 cycles.

327 *Blood glucose:* Blood was collected via a single tail-nick and immediately analyzed using a  
328 glucometer (Freestyle, Abbott). Blood collection was performed by trained professionals and in  
329 accordance with the University of Southern California Institutional Animal Care and Use  
330 Committee.

331

### 332 Western Blots

333 Protein samples were lysed in 1% Triton X-100 (Thermo Fisher Scientific, USA, #21568-2500)  
334 with 1 mM EDTA (Promega Life Sciences, USA, #V4231) and 100 mM Tris-HCl pH 7.5 (Quality

335 Biological, USA, #351-006-101) and protease inhibitors (Roche, Germany, #118636170001) and  
336 sonicated using a Sonic Dismembrator (Fisher Scientific, USA). Samples were heated at 95°C for  
337 five minutes. Samples were ran on 4-20% gradient tris-glycine gels (TGX; Bio-Rad, USA, #456-  
338 1104) and transferred onto 0.2 µM PVDF membranes (Bio-Rad #162-0184) using a Transblot  
339 Turbo semi-dry transfer system (Bio-Rad) at 9 volts for 15 minutes. Membranes were blocked for  
340 1 hour using 5% BSA (Akron Biotech, USA, #AK8905-0100) in tris-buffered saline containing  
341 0.05% Tween-20 (Bio-Rad #161-0781) and incubated in primary antibodies against MOTS-c  
342 (rabbit polyclonal; YenZym, USA) and GAPDH (cat# 5174; Cell Signaling, USA) overnight at  
343 4°C. Secondary HRP-conjugated antibodies (#7074; Cell Signaling, USA) were then added  
344 (1:30,000) for one hour at room temperature. Chemiluminescence was detected and imaged using  
345 Clarity western ECL substrate (Bio-Rad #1705060) and Chemidoc XRS system (Bio-Rad).  
346 Western blots were quantified using ImageJ version 1.52k.

347

#### 348 Cell Studies

349 *Cell culture:* C2C12 cells were cultured in DMEM with 4.5 g/L glucose (Corning, USA #10-017-  
350 CV) and 10% FBS (Millipore-Sigma, USA, #F0926-500). All cells were stored at 37°C and 5%  
351 CO<sub>2</sub>. Cells were passaged when they reached 75-80% confluence using TrypLE (Thermo Fisher  
352 Scientific #12605-010).

353 *Cell survival assays:* Protection against glucose restriction (GR) and serum deprivation (SD) was  
354 tested by culturing cells in DMEM (Thermo Fisher Scientific #11966-025) with 0.5 g/L glucose  
355 (Millipore-Sigma #G8769) and 1% FBS. MOTS-c (10µM) or vehicle (PBS). MOTS-c (10µM)  
356 was added to the media every 24 hours. After 48 hours of GR/SD, we performed crystal violet  
357 (Thermo Fisher Scientific #C581-25) staining as before (15) to determine cell survival. We also  
358 tested cellular proliferation, following prolonged (7-day) GR/SD (DMEM with 1% FBS and 0.5  
359 g/L glucose), as a measure of cellular fitness. In this case, MOTS-c-containing (10µM) media was  
360 changed once every two days; no additional MOTS-c supplementation was given between media  
361 changes. After 7 days of GR/SD, we returned the cells to full growth media (10% FBS and 4.5 g/L  
362 glucose) for 48 hours with MOTS-c (10µM), then stained them with crystal violet. To determine  
363 the metabolic flexibility to utilize fatty acids, we cultured cells in DMEM with 1% FBS, 0.5 g/L

364 glucose, and 1% chemically defined lipid mixture (Millipore-Sigma #L0288) for 48 hours, then  
365 stained them with crystal violet.

366 *Metabolic flux:* Real-time oxygen consumption and extracellular acidification rates in C2C12  
367 myoblasts treated with 16% palmitate-BSA (1mM palmitate conjugated to 0.17mM BSA) or 16%  
368 BSA (0.17 mM; Seahorse Bioscience #102720-100) were obtained using the XF96 Bioanalyzer  
369 (Seahorse Bioscience) at the USC Leonard Davis School of Gerontology Seahorse Core. All values  
370 were normalized to relative protein concentration using a BCA protein assay kit (Thermo Fisher  
371 Scientific #23227).

372 *Confocal microscopy:* Confocal images were obtained using a Zeiss Confocal Laser Scanning  
373 Microscope 700 (Zeiss, Germany). C2C12 myoblasts were cultured on glass coverslips  
374 (Chemglass, USA, #CLS-1760-015). Cells were treated with FITC-MOTS-c (New England  
375 Peptide) for either 0 hours (immediate), 30 minutes, 4 hours, or 24 hours. Some cells were left as  
376 untreated controls (data not shown). All cells were treated with Hoeschst (Biotium, USA, #40045)  
377 for 15 minutes and then washed three times with PBS. Cells were fixed in 10% formalin  
378 (Millipore-Sigma #EM-R04586-82) and washed an additional three times in PBS. Coverslips were  
379 affixed to glass slides (VWR, USA, #48300-025) using ProLong Gold antifade reagent (Life  
380 Technologies Corporation, USA, #P36934).

381

## 382 Human Studies

### 383 *Study outline:*

384 Participants gave written consent before the commencement of the study, which was approved by  
385 the Northern Health and Disability Ethics Committee (New Zealand) (16/STH/116/AM01). 10  
386 sedentary (<4h aerobic exercise/week) healthy young males ( $24.5 \pm 3.7$  years old and BMI  $24.1 \pm$   
387  $2.1$ ) were recruited to take part in a two-visit exercise trial. Recruited participants were free of  
388 cardiovascular, metabolic and blood diseases and were not taking any medication or supplements.  
389 The trial was separated into two visits, each involving exercise bouts that were carried out on an  
390 electromagnetically braked cycle ergometer (Velotron, RacerMate, USA).

391 *Determination of peak oxygen uptake ( $VO_2$ peak) and maximal power output (visit 1):* Peak oxygen  
392 uptake was determined using a ramped cycling exercise protocol. Prior to testing, participants  
393 warmed up for five minutes at a self-selected workload between 60 and 80W. The ramp protocol  
394 began at 60W, with the cycling power output set to increase by 1W every 4 seconds (15W/min)  
395 continuously until the participant was unable to maintain cycling workload (cycling  
396 cadence < minimum 60 revolutions per minute) or maximal volitional fatigue was reached. Mean  
397 Peak oxygen uptake of participants was reported as  $38.4 \pm 7.3$  ml.kg.min.

398 *Acute high intensity cycling exercise session (visit 2):* Prior to visit 2, participants were asked to  
399 fast overnight (from 10PM) and were instructed to abstain from physical activity for at least 48h  
400 prior. Upon arrival to the laboratory, participants lay supine for 15-minutes and then had an  
401 intravenous cannula inserted into a forearm vein. A resting plasma sample was collected followed  
402 by a pre-exercise muscle biopsy taken from the vastus lateralis muscle (quadriceps muscle).  
403 Approximately 10-minutes later, participants completed ten, 60-second cycling intervals at  
404 individually-specified peak power workloads (determined from peak oxygen uptake test) followed  
405 by 75-seconds of rest/low intensity cycling (<30W) per interval as previously described (55). A  
406 mid-exercise blood sample was taken following the completion of the 5<sup>th</sup> exercise interval as well  
407 as immediately following the completion of the exercise bout. In addition, an immediately-post  
408 exercise muscle biopsy was taken (within ~5-minutes of completion of the exercise bout).  
409 Participants remained supine and resting in the procedure bed for a 4-hour recovery period.  
410 Following four-hours of recovery, a final blood and muscle biopsy sample was collected.

411 *Muscle biopsy and blood sampling:* Muscle biopsies were extracted under local anesthesia (1%  
412 xylocaine) using the Bergstrom needle with manual suction technique(56). Biopsies were snap-  
413 frozen in liquid nitrogen and stored at  $-80^{\circ}\text{C}$  until analyzed. Blood was drawn through a 20-gauge  
414 cannula, collected in 10-mL EDTA vacutainers and then centrifuged immediately upon collection  
415 at  $4^{\circ}\text{C}$  at 2,000 g for 10 minutes. Plasma was extracted and then stored at  $-80^{\circ}\text{C}$  until further  
416 analysis using an in-house ELISA as described before (13). Human skeletal muscle was processed  
417 for western blotting by soaking the samples in lysis buffer (above) and minced using a razor blade.  
418 Once the sample was evenly minced, we proceeded with the Sonic Dismembrator step as described  
419 above.

420

## 421 Liquid Chromatography-Mass Spectrometry Metabolomics

422 Metabolites were extracted from randomly selected tissue samples by adding 1 mL of 80:20  
423 methanol:water solution on dry ice. Samples were incubated at -80C for 4 hours and centrifuged  
424 at 4C for 5 minutes at 15k rpm. Supernatants were transferred into LoBind Eppendorf  
425 microcentrifuge tubes and the cell pellets were re-extracted with 200  $\mu$ L ice-cold 80% MeOH,  
426 spun down and the supernatants were combined. Metabolites were dried at room temperature under  
427 vacuum and re-suspended in water for injection.

428 Samples were randomized and analyzed on a Q-Exactive Plus hybrid quadrupole-Orbitrap mass  
429 spectrometer coupled to an UltiMate 3000 UHPLC system (Thermo Scientific). The mass  
430 spectrometer was run in polarity switching mode (+3.00 kV/-2.25 kV) with an m/z window ranging  
431 from 65 to 975. Mobile phase A was 5 mM NH<sub>4</sub>AcO, pH 9.9, and mobile phase B was acetonitrile.  
432 Metabolites were separated on a Luna 3  $\mu$ m NH<sub>2</sub> 100 Å (150  $\times$  2.0 mm) column (Phenomenex).  
433 The flowrate was 300  $\mu$ L/min, and the gradient was from 15% A to 95% A in 18 min, followed by  
434 an isocratic step for 9 min and re-equilibration for 7 min. All samples were injected twice for  
435 technical duplicates. Metabolites were detected and quantified as area under the curve based on  
436 retention time and accurate mass ( $\leq$  5 ppm) using the TraceFinder 3.3 (Thermo Scientific)  
437 software.

438

## 439 RNA-seq

440 *RNA purification from tissue and cells:* Total RNA extraction from skeletal muscle tissue or  
441 C2C12 mouse myoblasts was done using TRI Reagent (Millipore-Sigma #T9424). Muscle tissue  
442 samples were flash-frozen in liquid nitrogen until further processing. Tissues were resuspended in  
443 600 $\mu$ L of TRI Reagent, then homogenized on Lysing Matrix D 2mL tubes (MP Biomedicals) on  
444 a BeadBug homogenizer (Benchmark Scientific). For both skeletal muscle and C2C12 cells, total  
445 RNA was purified using the Direct-zol RNA MiniPrep (Zymo Research #R2052).

446 *RNA-seq library preparation:* Total RNA was subjected to rRNA depletion using the NEBNext  
447 rRNA Depletion Kit (New England Biolabs), according to the manufacturer's protocol. Strand  
448 specific RNA-seq libraries were then constructed using the SMARTer Stranded RNA-Seq Kit  
449 (Clontech # 634839), according to the manufacturer's protocol. Based on rRNA-depleted input



450 amount, 13-15 cycles of amplification were performed to generate RNA-seq libraries. Paired-end  
451 150bp reads were sent for sequencing on the Illumina HiSeq-Xten platform at the Novogene  
452 Corporation (USA). The raw sequencing data was deposited to the NCBI Sequence Read Archive  
453 (accession: PRJNA556045). The resulting data was then analyzed with a standardized RNA-seq  
454 data analysis pipeline (described below).

455 *RNA-seq analysis pipeline:* To avoid the mapping issues due to overlapping sequence segments in  
456 paired end reads, reads were hard trimmed to 75bp using the Fastx toolkit v0.0.13. Reads were  
457 then further quality-trimmed using TrimGalore 0.4.4 ([github.com/FelixKrueger/TrimGalore](https://github.com/FelixKrueger/TrimGalore)) to  
458 retain high-quality bases with Phred score > 20. All reads were also trimmed by 6 bp from their 5'  
459 end to avoid poor qualities or biases. cDNA sequences of protein coding and lincRNA genes were  
460 obtained through ENSEMBL Biomart for the GRCh38 build of the mouse genome (Ensemble  
461 release v94). Trimmed reads were mapped to this reference using kallisto 0.43.0-1 and the –fr-  
462 stranded option (57). All subsequent analyses were performed in the R statistical software  
463 (<https://cran.r-project.org/>).

464 Read counts were imported into R, and summarized at the gene level, to estimate differential gene  
465 expression as a function of age.

466 Because of high sample variability, we used surrogate variable analysis to remove experimental  
467 noise from the muscle RNA-seq dataset (58). R package ‘sva’ v3.24.4 (59) was used to estimate  
468 surrogate variable, and the effects of surrogate variables were regressed out using ‘limma’.  
469 Corrected read counts were then used for downstream analyses.

470 DESeq2 normalized fold-changes were then used to estimate differential gene expression between  
471 control and MOTS-c treated muscle or cell samples using the ‘DESeq2’ R package (DESeq2  
472 1.16.1)(60). The heatmap of expression across samples for significant genes (Fig. 4G) was plotted  
473 using the R package ‘pheatmap’ 1.0.10 (Raivo Kolde, 2015-12-11; [https://CRAN.R-](https://CRAN.R-project.org/package=pheatmap)  
474 [project.org/package=pheatmap](https://CRAN.R-project.org/package=pheatmap)). Putative protein-protein interaction was derived using the  
475 STRING (Search Tool for the Retrieval of Interacting Genes/Proteins) database version 11.0 (61)  
476 (<https://string-db.org/>).

477

478

## 479 Functional enrichment analysis

480 To perform functional enrichment analysis, we used the Gene Set Enrichment Analysis paradigm  
481 through its implementation in the R package ‘ClusterProfiler’ v3.10.1 (62), and Bioconductor  
482 annotation package ‘org.Mm.eg.db’ v3.7.0. Balloon plots representing the output were generated  
483 using R packages ‘ggplot2’ v3.1.0 and ‘scales’ 1.0.0.

484

## 485 Principal Component Analysis

486 *Metabolites*: Principal component analysis (PCA) was performed using the mean-centered matrix  
487 of metabolite values per each mouse. Principal components that separated sample groups were  
488 identified with visual inspection. Loadings from principal components that stratify experimental  
489 samples versus controls were then queried against metabolic pathways using a Kolmogorov-  
490 Smirnov statistic against the expected distribution of metabolites. Metabolic pathway enrichment  
491 analysis (gene set enrichment analysis, GSEA) (63) were performed using 28 metabolic pathways  
492 defined by the Kyoto Encyclopedia of Genes and Genomes (KEGG) database using pathways with  
493 four or more measured metabolites.

494 *RNA-seq*: PCA was performed using the R base package function ‘prcomp’. The first 2 principal  
495 components were used.

496

## 497 Quantification and Statistical Analysis

498 Unless otherwise noted, statistical significance was determined using the Student *t*-test. Statistical  
499 tests were performed using GraphPad Prism version 8.1.2. Results of *t*-tests are indicated in all  
500 figures as \* $p < 0.05$ , \*\*  $p < 0.01$ , \*\*\* $p < 0.001$  and *ns* for not significant ( $p > 0.05$ ).

501 The RNA-seq analytical code will be made available on the Benayoun lab github  
502 ([https://github.com/BenayounLaboratory/MOTSc\\_Exercise](https://github.com/BenayounLaboratory/MOTSc_Exercise)).

503

504

505

506 **Figure Legends:**

507 **Fig. 1. MOTS-c responds to and regulates exercise in young subjects.** (A) Schedule of exercise  
508 on a stationary bicycle and blood and skeletal muscle collection in young male subjects (n=10).  
509 (B, C) Representative western blot of MOTS-c from skeletal muscle and quantification (D)  
510 Quantification of serum MOTS-c levels by ELISA. Data expressed as mean +/- SEM. Wilcoxon  
511 matched-pairs signed rank test was used for (C, D).

512

513 **Fig. 2. MOTS-c treatment increases physical capacity in young mice regardless of diet.** (A-  
514 C) Treadmill performance of 12-week old male CD-1 (outbred) mice fed a normal diet (n=5-6);  
515 (A) running curves, (B) total time on treadmill, (C) total distance ran, and (D) percent capable of  
516 reaching the highest speed (sprint). (E-H) Treadmill performance of 12-week old male C57BL/6J  
517 (inbred) mice fed a HFD (n=8); (E) running curves, (F) total time on treadmill (G) total distance  
518 ran (H) percent capable of reaching the highest speed (final stage). (I) PCA and MSEA on  
519 metabolomic data from skeletal muscle and liver of C57BL/6J mice that were fed a HFD, treated  
520 with MOTS-c, and exercised. Data expressed as mean +/- SEM. Log-rank (Mantel-Cox) test was  
521 used for (A, E). Otherwise, all statistics were performed using the Student's *t*-test. \* $P < 0.05$ , \*\*  
522  $P < 0.01$ , \*\*\*  $P < 0.001$ .

523

524 **Fig. 3. Acute MOTS-c treatment enhances physical capacity in old mice.** (A) Schedule of  
525 MOTS-c treatment and assays in middle-aged and old C57BL/6N mice (n=10 and 16-19,  
526 respectively), including (B) treadmill running curves, (C) total time on treadmill, (D) total distance  
527 ran on treadmill, and (E) percent capable of reaching the highest speed on a treadmill (final stage).  
528 (F) Respiratory exchange ratio (RER) following 2 weeks of daily MOTS-c injection (n=4). (G, H)  
529 Skeletal muscle from treadmill-exercised old mice (22.5 months) treated daily with MOTS-c (15  
530 mg/kg/day) for 2 weeks (n=10) were subject to (G) metabolomics and analyzed using PCA and  
531 MSEA and (H) GSEA analysis of muscle RNA-seq analysis. Balloon plots of select enriched terms  
532 using Gene Ontology Biological Process (GO\_BP) database at false discovery rate (FDR) < 15%.  
533 Full GSEA results are available in table S1. Data expressed as mean +/- SEM. Log-rank (Mantel-  
534 Cox) test was used for (B) and two-way ANOVA (repeated measures) was used for (F). GSEA

535 statistics from R package ‘clusterProfiler’ were used for (H). Otherwise, all statistics were  
536 performed using the Student’s *t*-test. \**P*<0.05, \*\* *P*<0.01, \*\*\* *P*<0.001.

537

538 **Fig. 4. MOTS-c regulates aging metabolism and healthspan.** Life-long measurements on male  
539 C57BL6/N mice treated intermittently (3x/week) with MOTS-c (15 mg/kg/day) starting at middle  
540 and old age (13.5 and 23.5 mo.) as described in Fig. 2a (n=16-19). (A) grip strength test (n=11),  
541 (B) gait analysis (stride length) (n=5), (C) 60-second walking test (n=11-12), and (D) blood  
542 glucose levels (n=11). (E, F) Body weight (E) as a function of time and (F) the total sum ( $\Sigma$ ); (G,  
543 H) Food intake (G) as a function of time and (H) the total sum ( $\Sigma$ ); (I, J) Percent fat mass (I) as a  
544 function of time and (J) the total sum ( $\Sigma$ ); (K, L) Percent lean mass (K) as a function of time and  
545 (L) the total sum ( $\Sigma$ ). (M) Lifespan curve; *P*=0.05 until 31.8 months of age. Overall curve trended  
546 towards increased median and maximum lifespan (*P*=0.23). Data expressed as mean +/- SEM.  
547 Log-rank (Mantel-Cox) test was used for (M). Otherwise, all statistics were performed using the  
548 Student’s *t*-test. \**P*<0.05, \*\* *P*<0.01, \*\*\* *P*<0.001.

549

550 **Fig. 5. MOTS-c regulates myoblast gene expression and enhances adaptation to metabolic**  
551 **stress.** (A-C) Survival of MOTS-c-treated (10 $\mu$ M; equal-volume vehicle control) C2C12  
552 myoblasts assessed by crystal violet staining following (A) 48 hours of glucose restriction (GR;  
553 0.5 g/L) and serum deprivation (SD; 1% FBS) with MOTS-c treated only once initially (n=12),  
554 (B) 7 days of GR/SD with daily MOTS-c treatment, followed by a 2-day recovery in full media  
555 with MOTS-c (n=10), and (C) 48 hours of complete GR (0 g/L) with chemically-defined lipid  
556 supplementation and daily MOTS-c treatment (n=6). (D) Real-time oxygen consumption rate  
557 (OCR) in response to fatty acid (palmitate-BSA) in C2C12 myoblasts treated with MOTS-c  
558 (10 $\mu$ M) for 48 hours (n=11-12). (E) Time-dependent subcellular localization pattern of  
559 exogenously treated MOTS-c-FITC (10 $\mu$ M) in C2C12 myoblasts. Scale bar: 10 $\mu$ m. (F-I) RNA-  
560 seq was performed on C2C12 myoblasts following 48 hours of GR/SD with/without a unique  
561 initial MOTS-c (10 $\mu$ M) treatment (n=6). (F) Principle Component Analysis (PCA) and (G)  
562 heatmap of significantly differentially regulated genes by MOTS-c at false discovery rate (FDR)  
563 < 5% by DESeq2 analysis. (H) Protein-protein interaction network analysis based on genes that  
564 were significantly differentially regulated by MOTS-c (FDR < 5%) using the STRING (Search

565 Tool for the Retrieval of Interacting Genes/Proteins) database version 11.0 (61). (I) Balloon plots  
566 of common biological processes derived from RNA-seq data between MOTS-c-treated (i) skeletal  
567 muscle from old mice (see Fig. 2) and (ii) C2C12 myoblasts, based on gene set enrichment analysis  
568 (GSEA) using gene ontology biological process (GO\_BP) (select gene sets; FDR < 15%). Data  
569 expressed as mean +/- SEM. Student's *t*-test. \* $P < 0.05$ , \*\*  $P < 0.01$ , \*\*\*  $P < 0.001$

570

571 **Acknowledgments:** We thank the USC Leonard Davis School of Gerontology Mouse  
572 Phenotyping core and Seahorse Bioanalyzer core and the USC Genomics core for experimental  
573 assistance. Funding was provided by the American Federation for Aging Research (AFAR), the  
574 National Institute on Aging (T32 AG052374) and the USC Manning Endowed Fellowship to  
575 J.C.R., a Mork Graduate Fellowship from the USC Viterbi School of Engineering to J.H.J., the  
576 USC Viterbi School of Engineering to N.A.G., the NIA (P01AG034906) to P.C., the NIA  
577 (R00AG049934), an innovator grant from the Rose Hills foundation, a seed grant the NAVIGAGE  
578 foundation, and the Hanson-Thorell Family to B.A.B., Rutherford Discovery Fellowship and a  
579 Marsden Fund Fast Start Grant to T.L.M., and the NIA (R01AG052258), Ellison Medical  
580 Foundation (EMF), AFAR, and the Hanson-Thorell Family to C.L.

581

582 **Author contributions:** J.C.R., T.L.M., B.A.B., P.C., N.A.G., D.C-S., and C.L. conceived the  
583 experiments. J.C.R., J.S.T.W., B.A.B., R.L., R.W.L., J.H.J., C.J.M., and D.C-S. performed  
584 experiments. J.C.R., T.L.M., J.S.T.W., B.A.B., R.L., R.W.L., P.C., N.A.G., J.H.J., and C.L.  
585 analyzed the data. J.C.R. and C.L. wrote the manuscript.

586

587 **Competing interests:** P.C. and C.L. are consultants and shareholders of CohBar, Inc. All other  
588 authors declare no competing interests.

589

590 **Data and materials availability:** All data are available in the main manuscript and Extended Data  
591 material. RNA-seq data have been uploaded to the NCBI SRA database (accession:  
592 PRJNA556045).

593

594 **References:**

- 595 1. C. Lopez-Otin, M. A. Blasco, L. Partridge, M. Serrano, G. Kroemer, The hallmarks of aging. *Cell*  
596 **153**, 1194-1217 (2013).
- 597 2. C. Lopez-Otin, L. Galluzzi, J. M. Freije, F. Madeo, G. Kroemer, Metabolic Control of Longevity. *Cell*  
598 **166**, 802-821 (2016).
- 599 3. A. Bratic, N. G. Larsson, The role of mitochondria in aging. *J Clin Invest* **123**, 951-957 (2013).
- 600 4. S. Hill, H. Van Remmen, Mitochondrial stress signaling in longevity: A new role for mitochondrial  
601 function in aging. *Redox biology* **2**, 936-944 (2014).
- 602 5. Martin B. Jensen, H. Jasper, Mitochondrial Proteostasis in the Control of Aging and Longevity.  
603 *Cell metabolism* **20**, 214-225 (2014).
- 604 6. Y. Wang, S. Hekimi, Mitochondrial dysfunction and longevity in animals: Untangling the knot.  
605 *Science* **350**, 1204-1207 (2015).
- 606 7. T. E. S. Kauppila, J. H. K. Kauppila, N.-G. Larsson, Mammalian Mitochondria and Aging: An  
607 Update. *Cell metabolism* **25**, 57-71 (2017).
- 608 8. J. Y. Jang, A. Blum, J. Liu, T. Finkel, The role of mitochondria in aging. *J Clin Invest* **128**, 3662-3670  
609 (2018).
- 610 9. P. M. Quirós, A. Mottis, J. Auwerx, Mitonuclear communication in homeostasis and stress.  
611 *Nature Reviews Molecular Cell Biology* **17**, 213-226 (2016).
- 612 10. J. Durieux, S. Wolff, A. Dillin, The cell-non-autonomous nature of electron transport chain-  
613 mediated longevity. *Cell* **144**, 79-91 (2011).
- 614 11. C. Lee, K. Yen, P. Cohen, Humanin: a harbinger of mitochondrial-derived peptides? *Trends in*  
615 *endocrinology and metabolism: TEM*, (2013).
- 616 12. S.-J. Kim, J. Xiao, J. Wan, P. Cohen, K. Yen, Mitochondrially derived peptides as novel regulators  
617 of metabolism. *The Journal of Physiology* **595**, 6613-6621 (2017).
- 618 13. C. Lee *et al.*, The mitochondrial-derived peptide MOTS-c promotes metabolic homeostasis and  
619 reduces obesity and insulin resistance. *Cell Metab* **21**, 443-454 (2015).
- 620 14. K. Zarse, M. Ristow, A mitochondrially encoded hormone ameliorates obesity and insulin  
621 resistance. *Cell Metab* **21**, 355-356 (2015).
- 622 15. K. H. Kim, J. M. Son, B. A. Benayoun, C. Lee, The Mitochondrial-Encoded Peptide MOTS-c  
623 Translocates to the Nucleus to Regulate Nuclear Gene Expression in Response to Metabolic  
624 Stress. *Cell metabolism* **28**, 516-524 e517 (2018).
- 625 16. K. C. Mangalhará, G. S. Shadel, A Mitochondrial-Derived Peptide Exercises the Nuclear Option.  
626 *Cell Metab* **28**, 330-331 (2018).
- 627 17. W. Wong, Going nuclear with stress. *Science Signaling* **11**, (2018).
- 628 18. P. P. Singh, B. A. Demmitt, R. D. Nath, A. Brunet, The Genetics of Aging: A Vertebrate  
629 Perspective. *Cell* **177**, 200-220 (2019).
- 630 19. L. Fontana, L. Partridge, V. D. Longo, Extending healthy life span—from yeast to humans. *Science*  
631 **328**, 321-326 (2010).
- 632 20. B. K. Kennedy *et al.*, Geroscience: Linking Aging to Chronic Disease. *Cell* **159**, 709-713 (2014).
- 633 21. J. Campisi *et al.*, From discoveries in ageing research to therapeutics for healthy ageing. *Nature*  
634 **571**, 183-192 (2019).
- 635 22. D. E. Gottschling, T. Nyström, The Upsides and Downsides of Organelle Interconnectivity. *Cell*  
636 **169**, 24-34 (2017).
- 637 23. O. Matilainen, P. M. Quirós, J. Auwerx, Mitochondria and Epigenetics – Crosstalk in Homeostasis  
638 and Stress. *Trends in Cell Biology* **27**, 453-463 (2017).
- 639 24. M. Ramanjaneya *et al.*, Mitochondrial-Derived Peptides Are Down Regulated in Diabetes  
640 Subjects. *Frontiers in Endocrinology* **10**, (2019).

- 641 25. C. Q. Y. Yong, B. L. Tang, A Mitochondrial Encoded Messenger at the Nucleus. *Cells* **7**, (2018).
- 642 26. R. Alis, A. Lucia, J. R. Blesa, F. Sanchis-Gomar, The role of mitochondrial derived peptides (MDPs)
- 643 in metabolism. *Journal of cellular physiology* **230**, 2903-2904 (2015).
- 644 27. S. Li, I. Laher, Exercise Pills: At the Starting Line. *Trends in pharmacological sciences*, (2015).
- 645 28. A. Knoop, A. Thomas, M. Thevis, Development of a mass spectrometry based detection method
- 646 for the mitochondrion-derived peptide MOTS-c in plasma samples for doping control purposes.
- 647 *Rapid Commun Mass Spectrom* **33**, 371-380 (2019).
- 648 29. B. H. Goodpaster, L. M. Sparks, Metabolic Flexibility in Health and Disease. *Cell Metabolism* **25**,
- 649 1027-1036 (2017).
- 650 30. R. L. Smith, M. R. Soeters, R. C. I. Wüst, R. H. Houtkooper, Metabolic Flexibility as an Adaptation
- 651 to Energy Resources and Requirements in Health and Disease. *Endocrine Reviews* **39**, 489-517
- 652 (2018).
- 653 31. N. Barzilai, J. P. Crandall, S. B. Kritchevsky, M. A. Espeland, Metformin as a Tool to Target Aging.
- 654 *Cell Metabolism* **23**, 1060-1065 (2016).
- 655 32. M. Kaeberlein, P. S. Rabinovitch, G. M. Martin, Healthy aging: The ultimate preventative
- 656 medicine. *Science* **350**, 1191-1193 (2015).
- 657 33. N. L. Nadon, R. Strong, R. A. Miller, D. E. Harrison, NIA Interventions Testing Program:
- 658 Investigating Putative Aging Intervention Agents in a Genetically Heterogeneous Mouse Model.
- 659 *EBioMedicine* **21**, 3-4 (2017).
- 660 34. D. E. Harrison *et al.*, Rapamycin fed late in life extends lifespan in genetically heterogeneous
- 661 mice. *Nature* **460**, 392-395 (2009).
- 662 35. K. Mao *et al.*, Late-life targeting of the IGF-1 receptor improves healthspan and lifespan in
- 663 female mice. *Nature Communications* **9**, (2018).
- 664 36. P. D. Neuffer *et al.*, Understanding the Cellular and Molecular Mechanisms of Physical Activity-
- 665 Induced Health Benefits. *Cell Metab* **22**, 4-11 (2015).
- 666 37. L. R. Cataldo, R. Fernandez-Verdejo, J. L. Santos, J. E. Galgani, Plasma MOTS-c levels are
- 667 associated with insulin sensitivity in lean but not in obese individuals. *J Investig Med* **66**, 1019-
- 668 1022 (2018).
- 669 38. C. Du *et al.*, Circulating MOTS-c levels are decreased in obese male children and adolescents and
- 670 associated with insulin resistance. *Pediatr Diabetes*, (2018).
- 671 39. Q. Li *et al.*, Earlier changes in mice after D-galactose treatment were improved by mitochondria
- 672 derived small peptide MOTS-c. *Biochemical and biophysical research communications*, (2019).
- 673 40. H. Lu *et al.*, MOTS-c peptide regulates adipose homeostasis to prevent ovariectomy-induced
- 674 metabolic dysfunction. *J Mol Med (Berl)*, (2019).
- 675 41. M. Ramanjaneya *et al.*, Lipids and insulin regulate mitochondrial-derived peptide (MOTS-c) in
- 676 PCOS and healthy subjects. *Clinical Endocrinology*, (2019).
- 677 42. John, M. Hargreaves, Michael, Juleen, Integrative Biology of Exercise. *Cell* **159**, 738-749 (2014).
- 678 43. B. Egan, Juleen, Exercise Metabolism and the Molecular Regulation of Skeletal Muscle
- 679 Adaptation. *Cell metabolism* **17**, 162-184 (2013).
- 680 44. L. Packer, E. Cadenas, K. J. A. Davies, Free radicals and exercise: An introduction. *Free Radical*
- 681 *Biology and Medicine* **44**, 123-125 (2008).
- 682 45. T. L. Merry, M. Ristow, Do antioxidant supplements interfere with skeletal muscle adaptation to
- 683 exercise training? , n/a-n/a (2015).
- 684 46. D. Chrétien *et al.*, Mitochondria are physiologically maintained at close to 50 °C. *PLOS Biology*
- 685 **16**, e2003992 (2018).
- 686 47. S. J. Kim *et al.*, The mitochondrial-derived peptide MOTS-c is a regulator of plasma metabolites
- 687 and enhances insulin sensitivity. *Physiological Reports* **7**, (2019).
- 688 48. J. M. Son, C. Lee, Mitochondria: multifaceted regulators of aging. *BMB Reports* **52**, 13-23 (2019).

- 689 49. E. M. Crimmins, Lifespan and Healthspan: Past, Present, and Promise. *The Gerontologist* **55**, 901-  
690 911 (2015).
- 691 50. H. Zempo *et al.*, Relation between type 2 diabetes and m. 1382 A> C polymorphism which  
692 occurs amino acid replacement (K14Q) of mitochondria-derived MOTS-c. *The FASEB Journal* **30**,  
693 956.951-956.951 (2016).
- 694 51. N. Fuku *et al.*, The mitochondrial-derived peptide MOTS-c: a player in exceptional longevity?  
695 *Aging Cell* **14**, 921-923 (2015).
- 696 52. A. Das *et al.*, Impairment of an Endothelial NAD(+)-H2S Signaling Network Is a Reversible Cause  
697 of Vascular Aging. *Cell* **173**, 74-89 e20 (2018).
- 698 53. R. J. Carter, J. Morton, S. B. Dunnett, Motor coordination and balance in rodents. *Curr Protoc*  
699 *Neurosci* **Chapter 8**, Unit 8 12 (2001).
- 700 54. S. Brandhorst *et al.*, A Periodic Diet that Mimics Fasting Promotes Multi-System Regeneration,  
701 Enhanced Cognitive Performance, and Healthspan. *Cell Metabolism* **22**, 86-99 (2015).
- 702 55. C. P. Hedges *et al.*, Peripheral blood mononuclear cells do not reflect skeletal muscle  
703 mitochondrial function or adaptation to high-intensity interval training in healthy young men. *J*  
704 *Appl Physiol (1985)* **126**, 454-461 (2019).
- 705 56. J. Bergstrom, Percutaneous needle biopsy of skeletal muscle in physiological and clinical  
706 research. *Scand J Clin Lab Invest* **35**, 609-616 (1975).
- 707 57. N. L. Bray, H. Pimentel, P. Melsted, L. Pachter, Near-optimal probabilistic RNA-seq  
708 quantification. *Nature Biotechnology* **34**, 525-527 (2016).
- 709 58. J. T. Leek, J. D. Storey, Capturing Heterogeneity in Gene Expression Studies by Surrogate Variable  
710 Analysis. *PLoS Genetics* **3**, e161 (2007).
- 711 59. J. T. Leek *et al.*, sva: Surrogate Variable Analysis. R package version 3.32.1., (2019).
- 712 60. M. I. Love, W. Huber, S. Anders, Moderated estimation of fold change and dispersion for RNA-  
713 seq data with DESeq2. *Genome Biology* **15**, (2014).
- 714 61. D. Szklarczyk *et al.*, STRING v11: protein–protein association networks with increased coverage,  
715 supporting functional discovery in genome-wide experimental datasets. *Nucleic Acids Research*  
716 **47**, D607-D613 (2019).
- 717 62. G. Yu, L.-G. Wang, Y. Han, Q.-Y. He, clusterProfiler: an R Package for Comparing Biological  
718 Themes Among Gene Clusters. *OMICS: A Journal of Integrative Biology* **16**, 284-287 (2012).
- 719 63. A. Subramanian *et al.*, Gene set enrichment analysis: A knowledge-based approach for  
720 interpreting genome-wide expression profiles. *Proceedings of the National Academy of Sciences*  
721 **102**, 15545-15550 (2005).

722



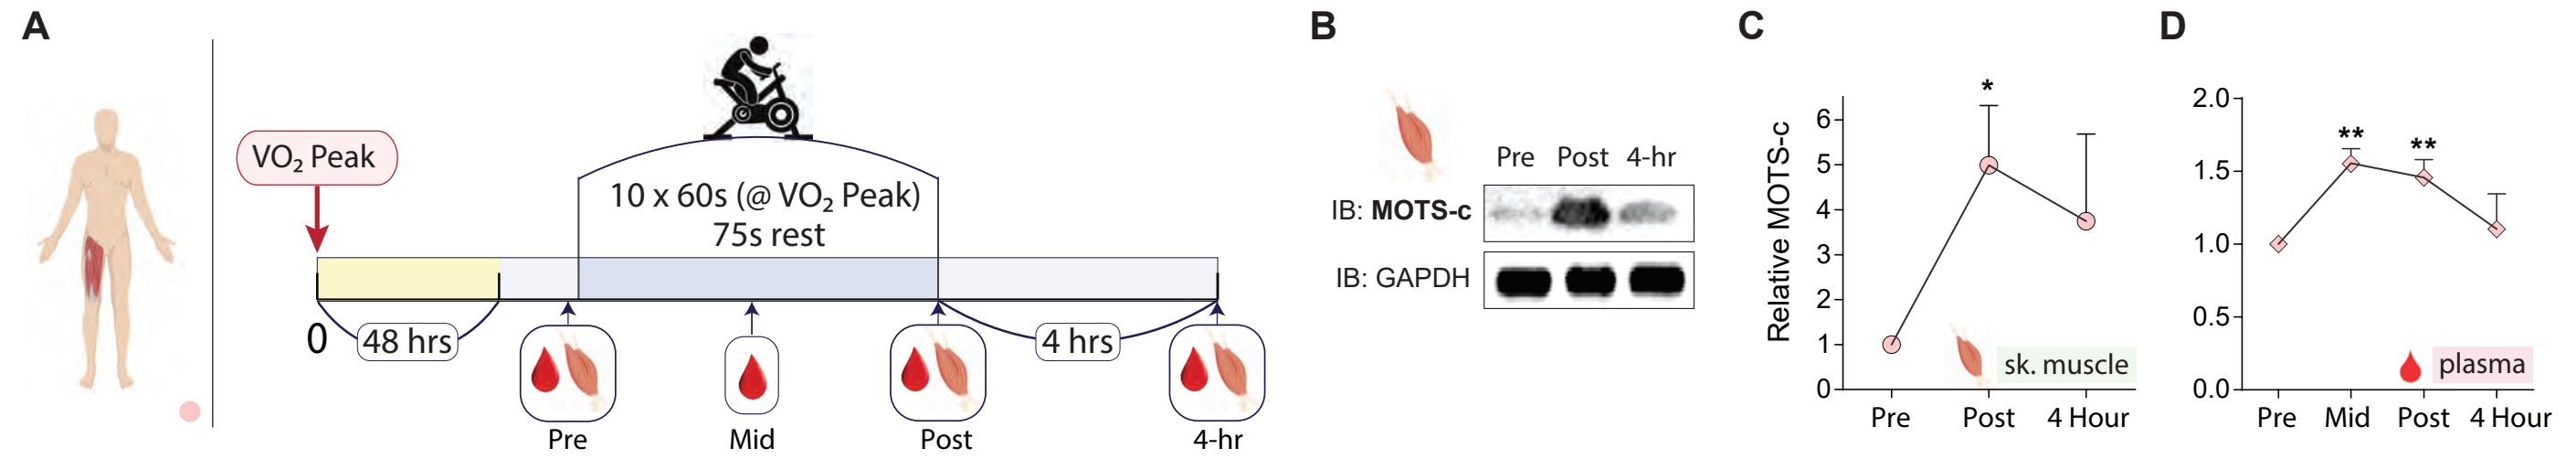

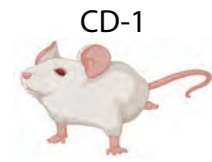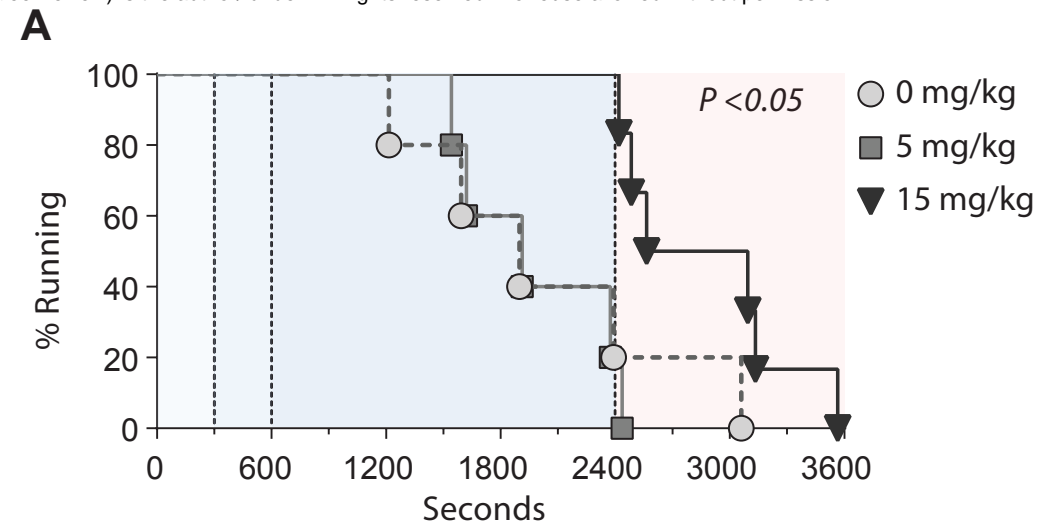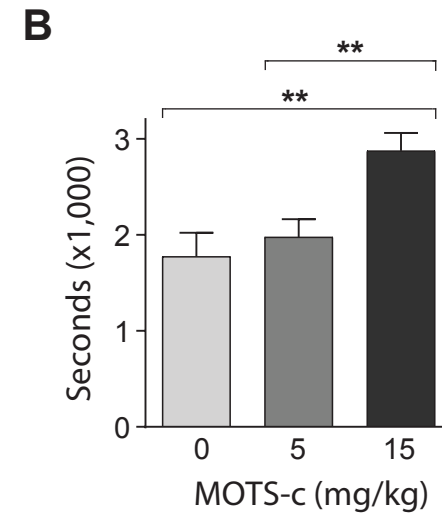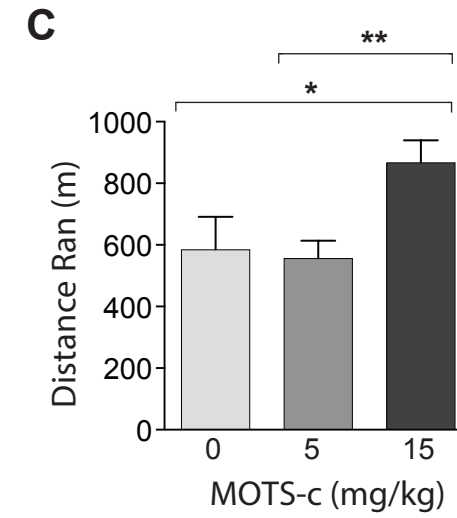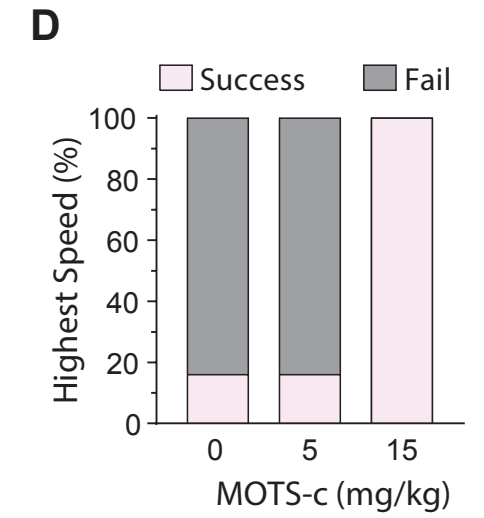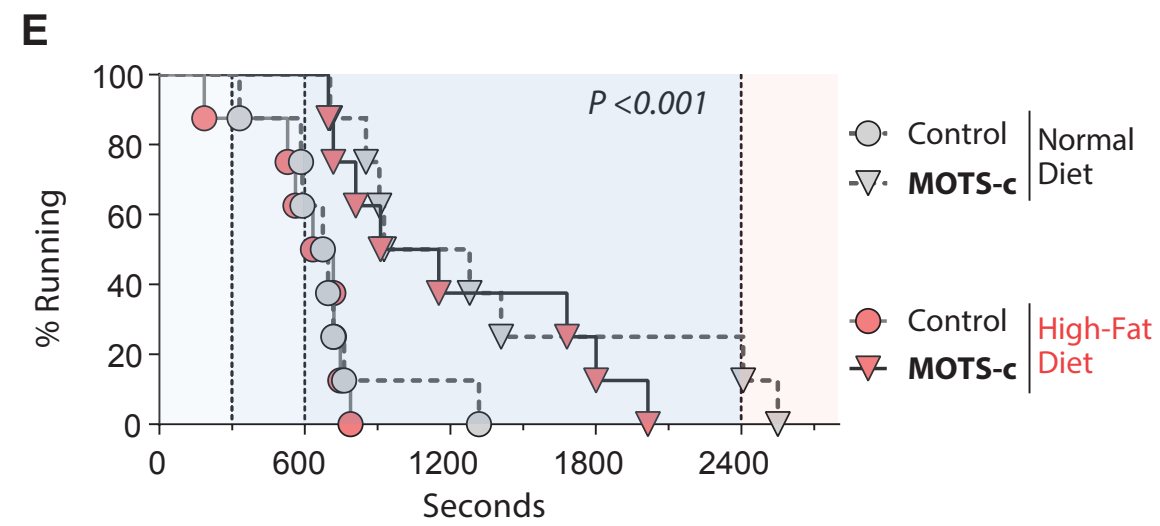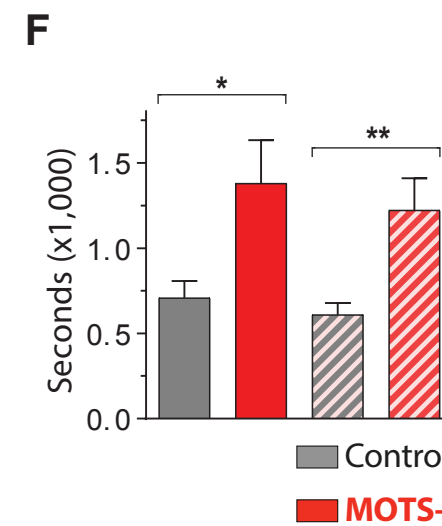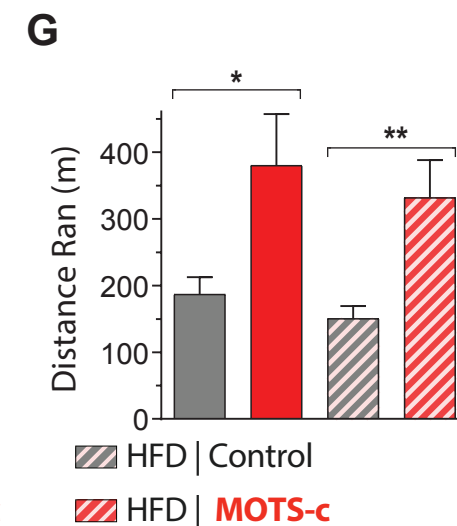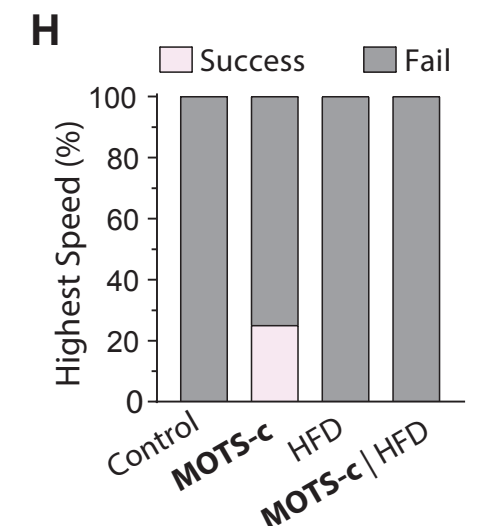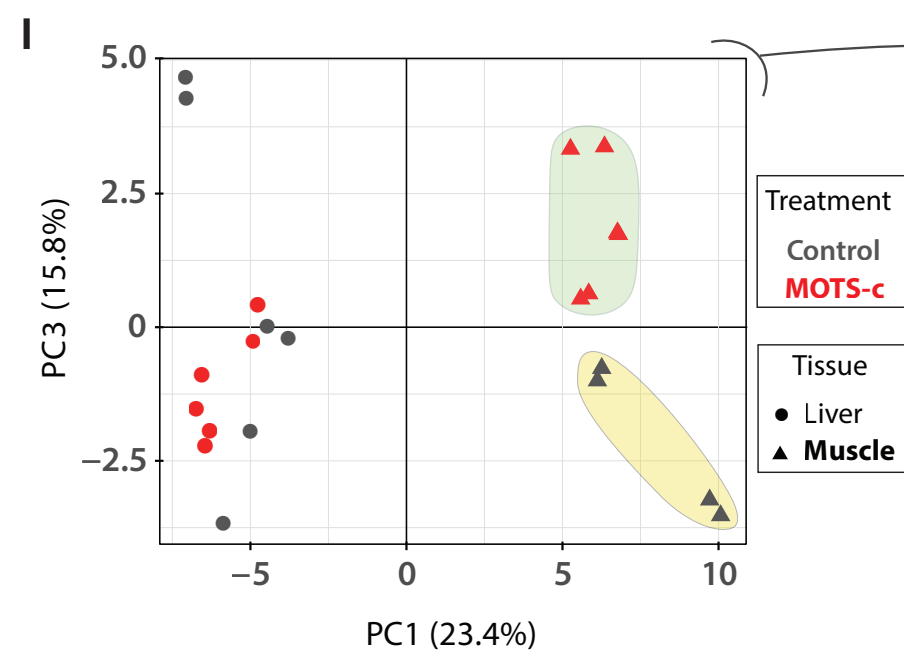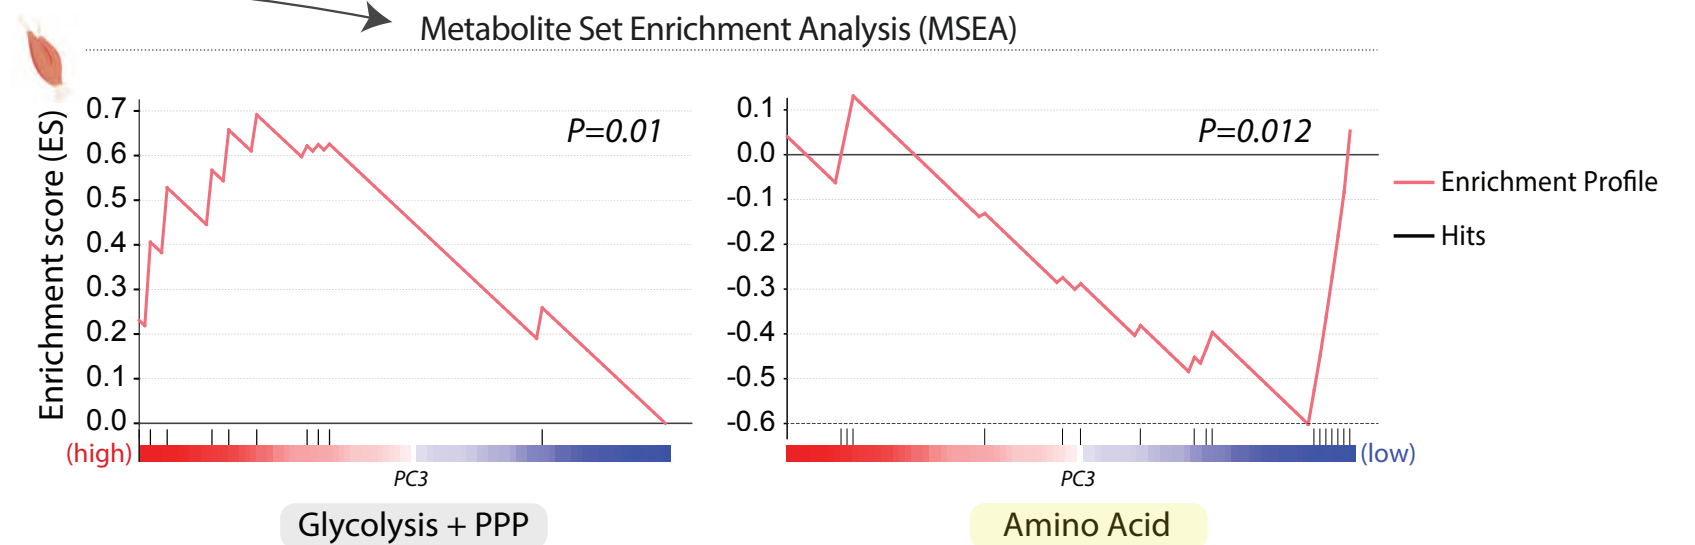

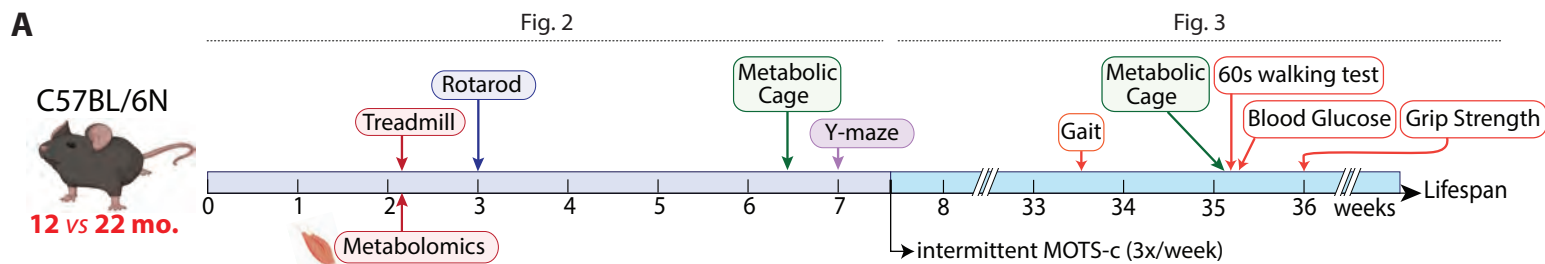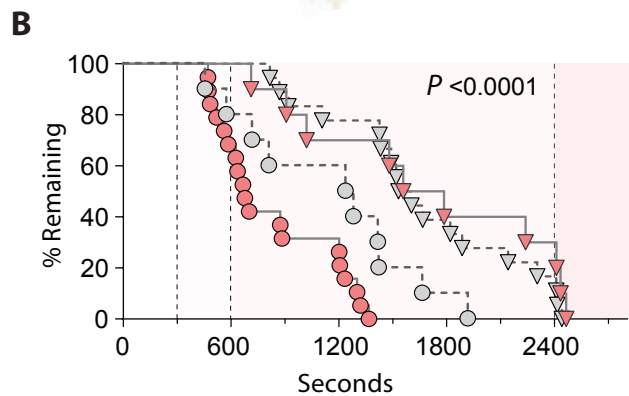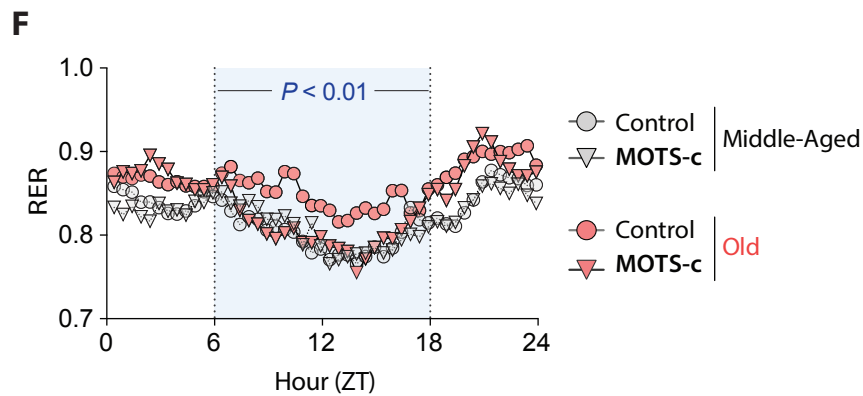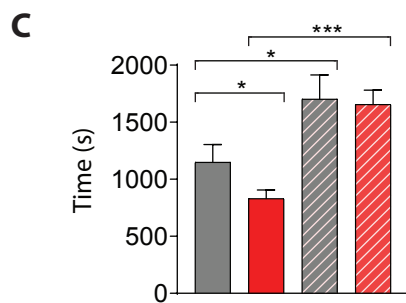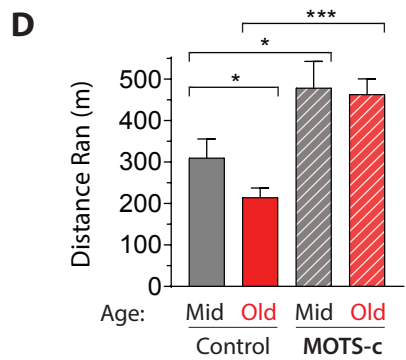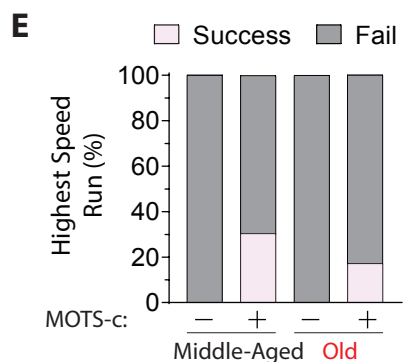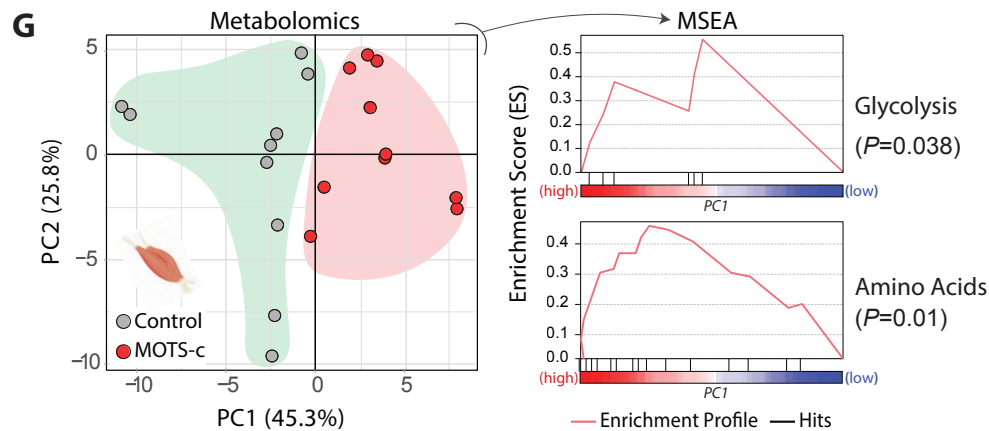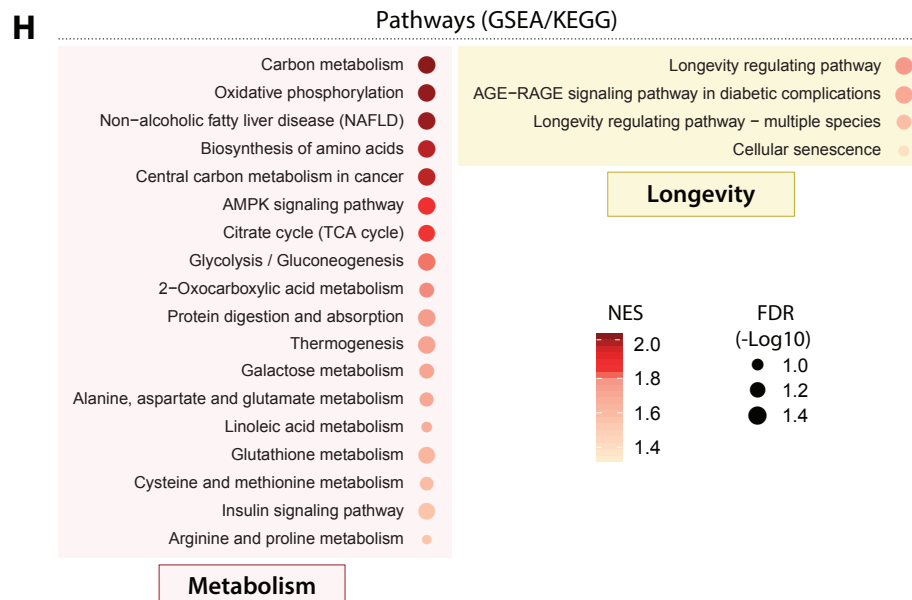

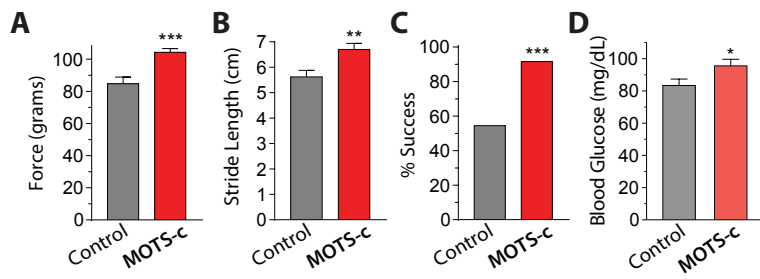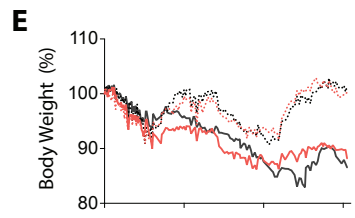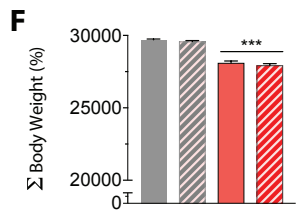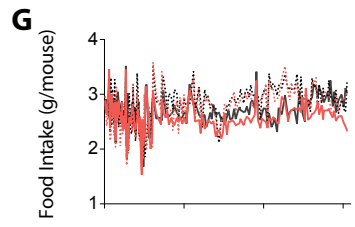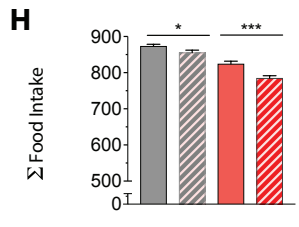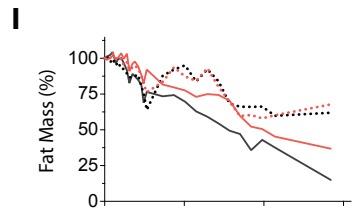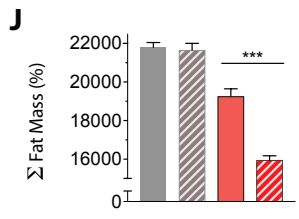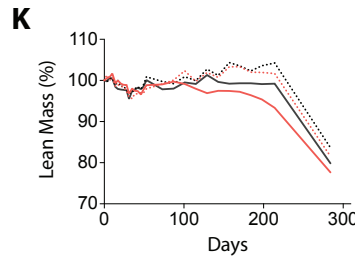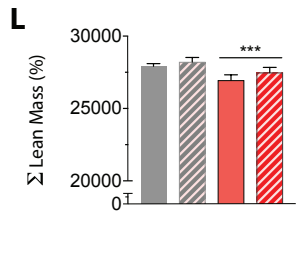

..... Middle-Aged Control  
 ..... Middle-Aged MOTS-c  
 — Old Control  
 — Old MOTS-c  
 — Middle-Aged Control  
 ▨ Middle-Aged MOTS-c  
 ■ Old Control  
 ▨ Old MOTS-c

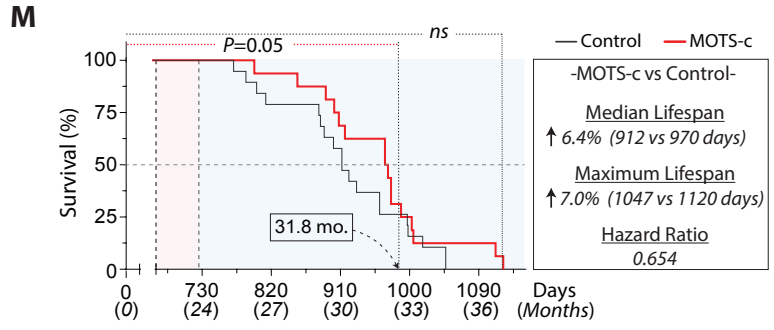

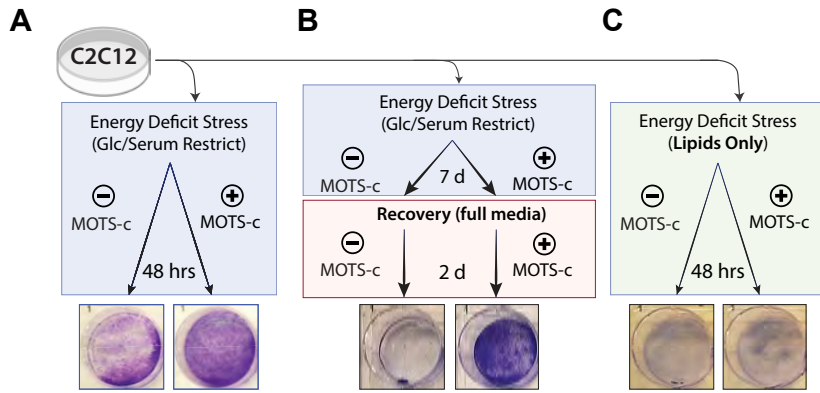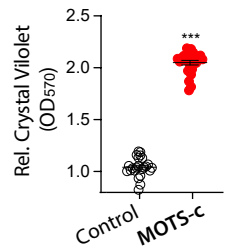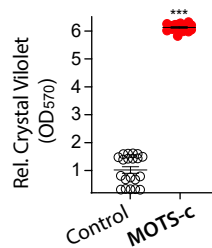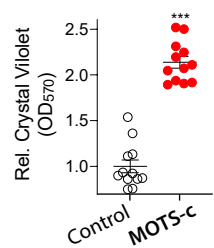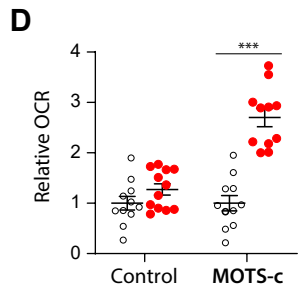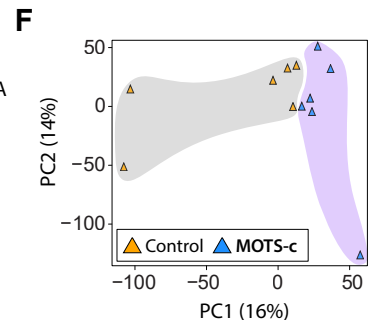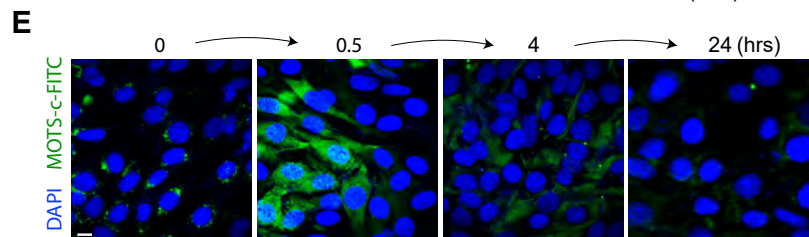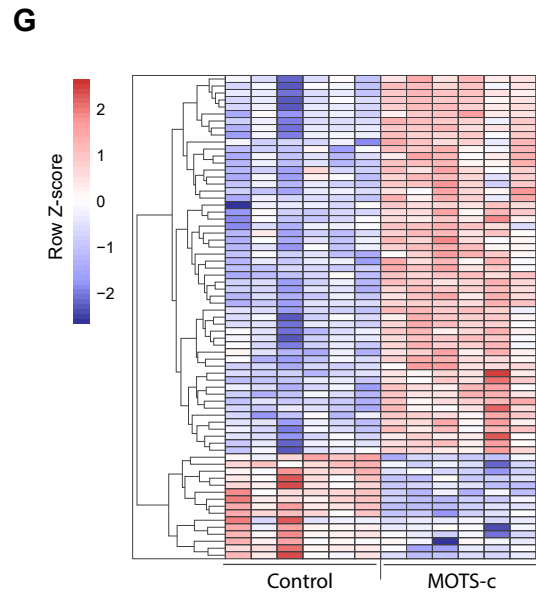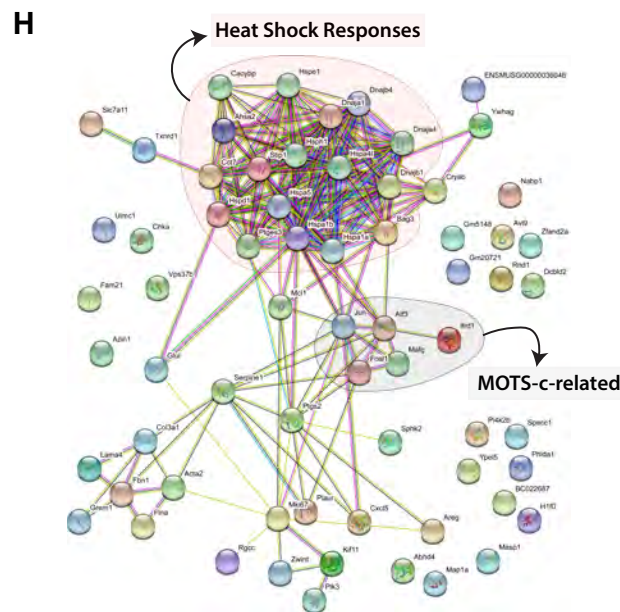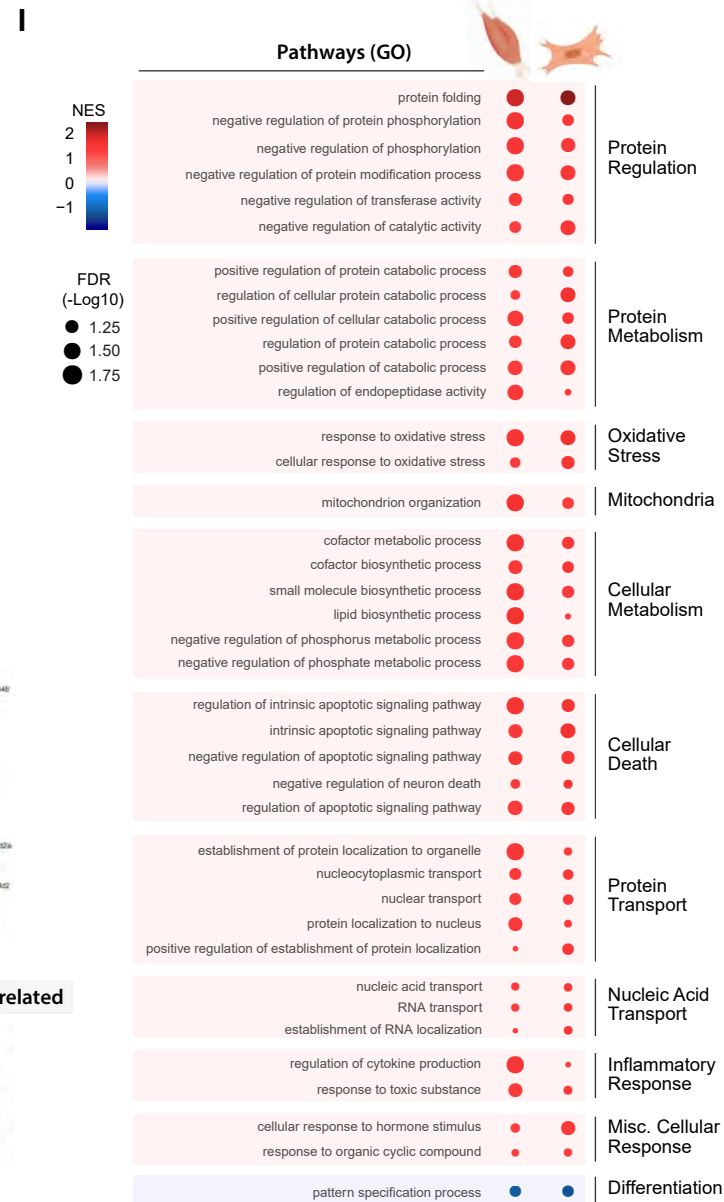

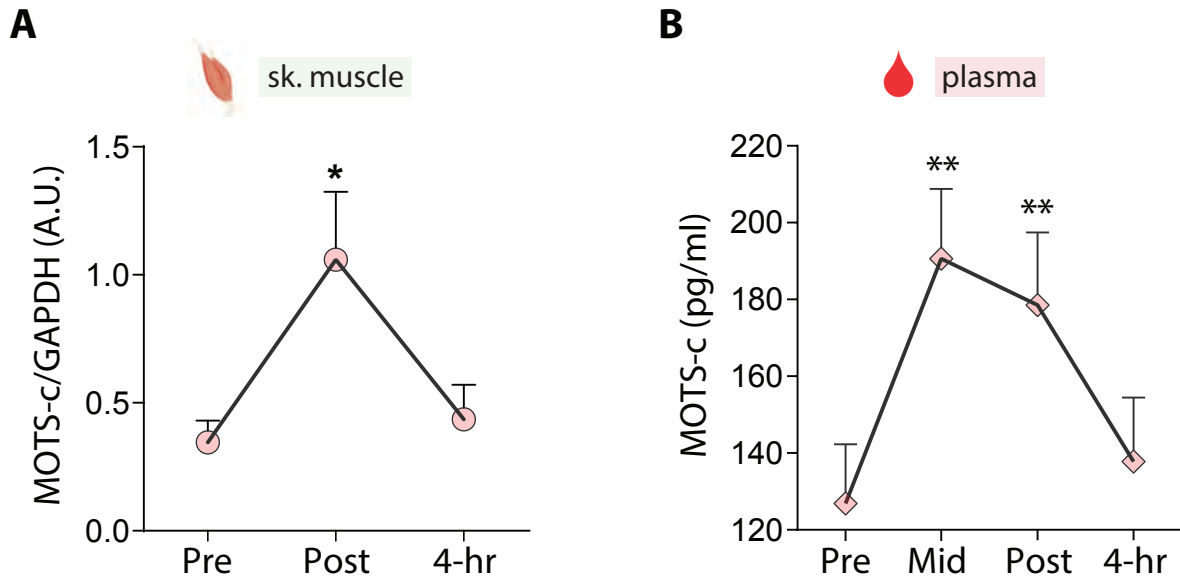

**Fig. S1. MOTS-c levels in human muscle and plasma.** MOTS-c levels measured by (A) Western blotting on human skeletal muscle collected pre-, post-exercise and 4- hours of resting and (B) ELISA on plasma from same individuals collected pre-, mid-, post- exercise and 4-hours of resting (n=10). Statistics by Wilcoxon matched-pairs signed rank test. \*\*P<0.01

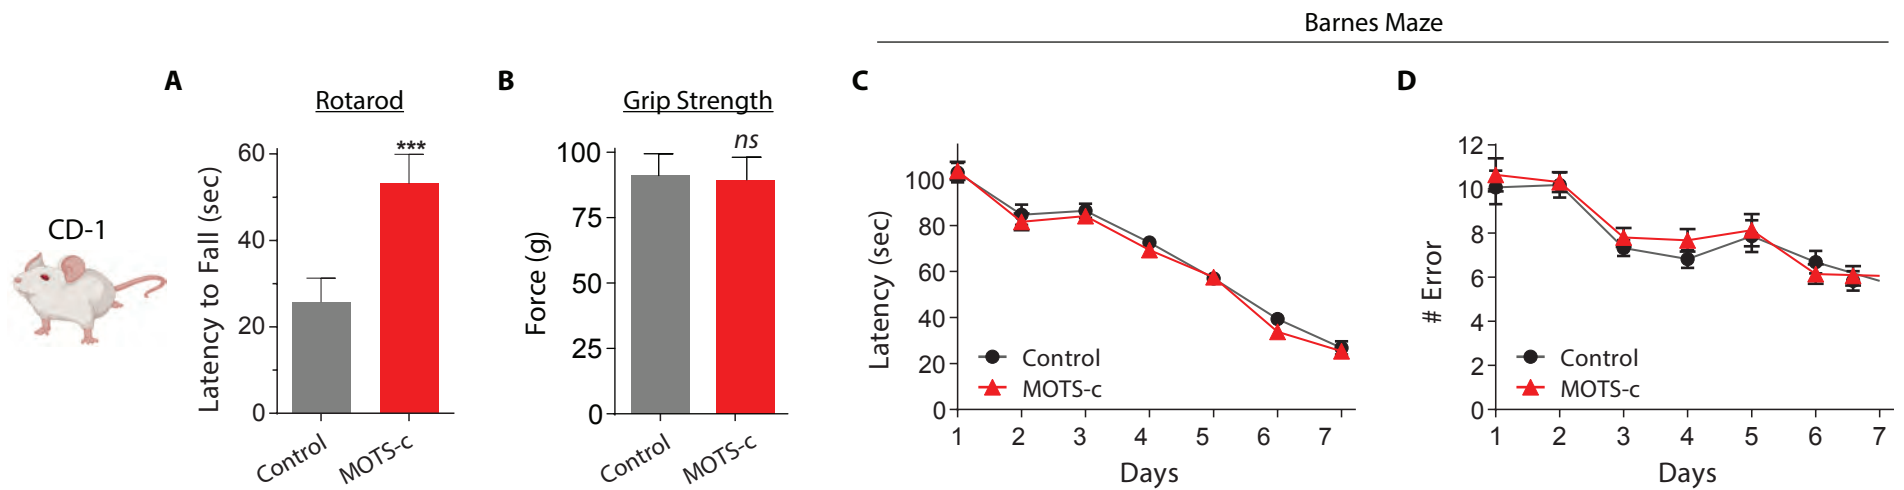

**Fig. S2. Rotarod, grip strength, and Barnes Maze tests in MOT5-c treated old mice.** (A) Summary of latency time to fall on the Rotarod test (n=15). The speed of the rotations increased from a starting speed of 24 rpm by 1 rpm every 10 seconds. (B) grip strength test. (C,D) Barnes Maze performance in control and MOT5-c treated 12-week old CD-1 mice (n=15). (C) There was no changes in average time to find the escape box (latency) between control and MOT5-c treated mice. (D) There was no change in the number of errors made prior to discovering the escape box between groups. Errors were defined as nose-pokes or head deflections over false holes. Data expressed as mean +/- SEM of three 24-hour acquisition cycles. Student's t-test. \*P<0.05, \*\*P<0.01, \*\*\*P<0.001.

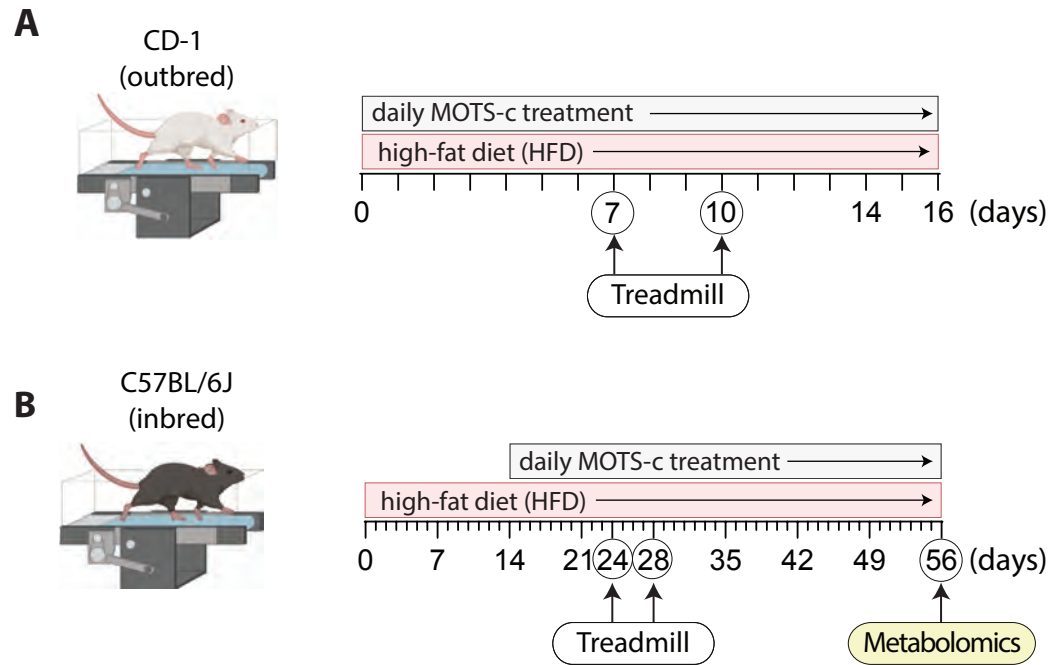

**Fig. S3. Outline of HFD mouse experiments.** Timeline of experiment for 12-week old male CD-1 (outbred) and C57BL/6J (inbred) mice fed a HFD or defined control diet. **(A)** CD-1 mice were fed a HFD and given daily intraperitoneal injections (IP) of MOTS-c (0, 5, or 15 mg/kg/day) from Day 0. Treadmill running tests were performed on Day 7 (fig. S4a) and Day 10 (Fig. 1e-h). Daily MOTS-c injections ceased at Day 16. **(B)** C57BL/6J mice were started on either a HFD or a defined control diet on Day 0 and continued uninterrupted throughout the experiment. Daily MOTS-c treatment (15 mg/kg; IP) started on Day 14. Treadmill running tests were performed on Day 24 and Day 28 (10 days and 14 days after the start of MOTS-c treatment) (Fig. 1i-l; fig. S4b). Mice were treated daily until Day 56, at which time metabolomics was performed (Fig. 1m).



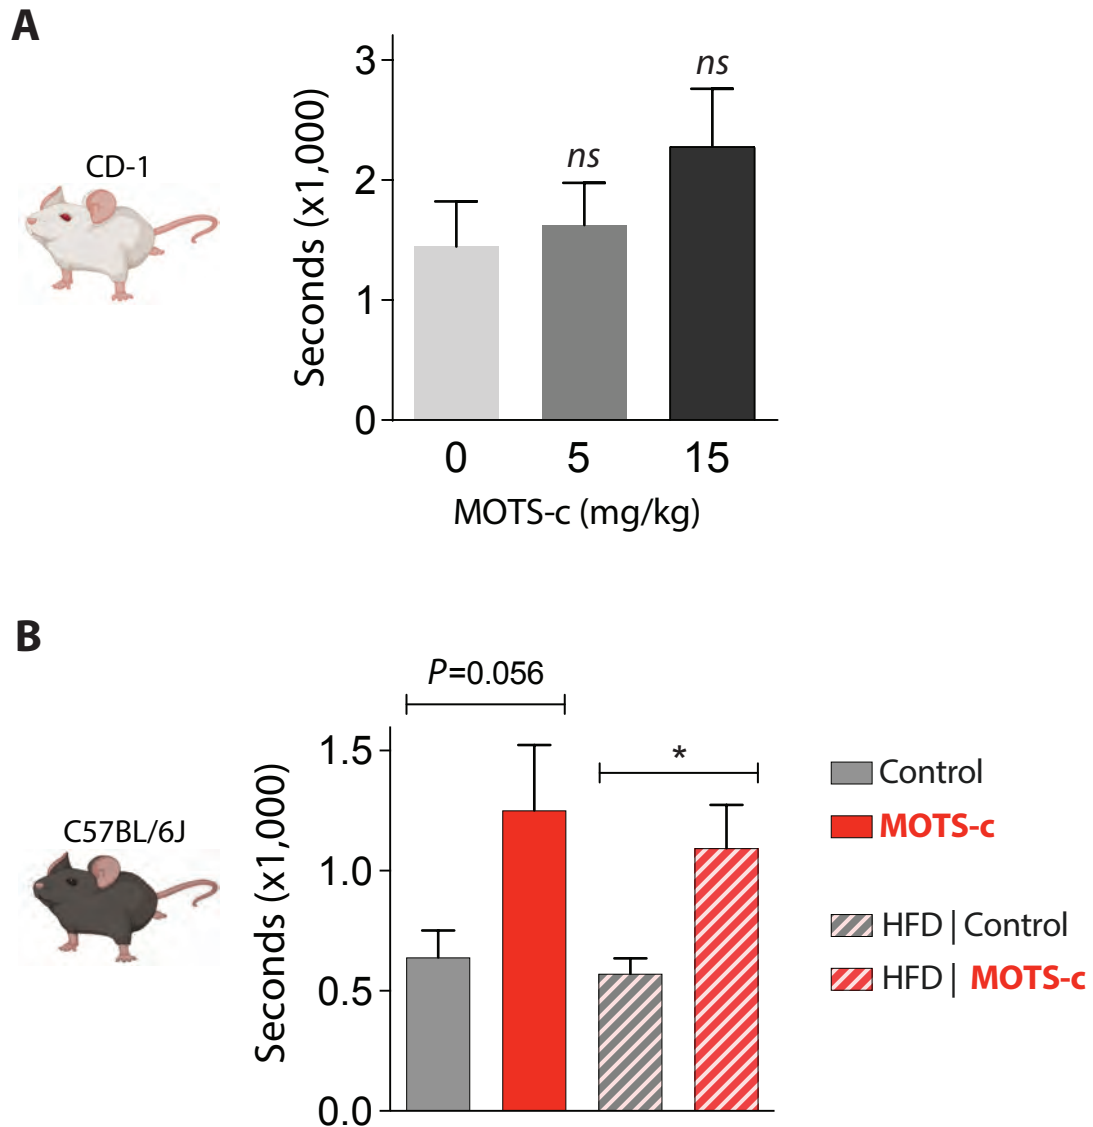

**Fig. S4. Initial running time of MOTS-c-treated young mice. (A)** Running time of CD-1 mice following seven days of MOTS-c treatment (n=5-6). MOTS-c (15 mg/kg/day) treatment showed a trend towards enhanced running performance. **(B)** Running time of HFD-fed C57BL/6J mice following 10 days of MOTS-c treatment (n=8). Data expressed as mean +/- SEM. Student's t-test. \*P<0.05

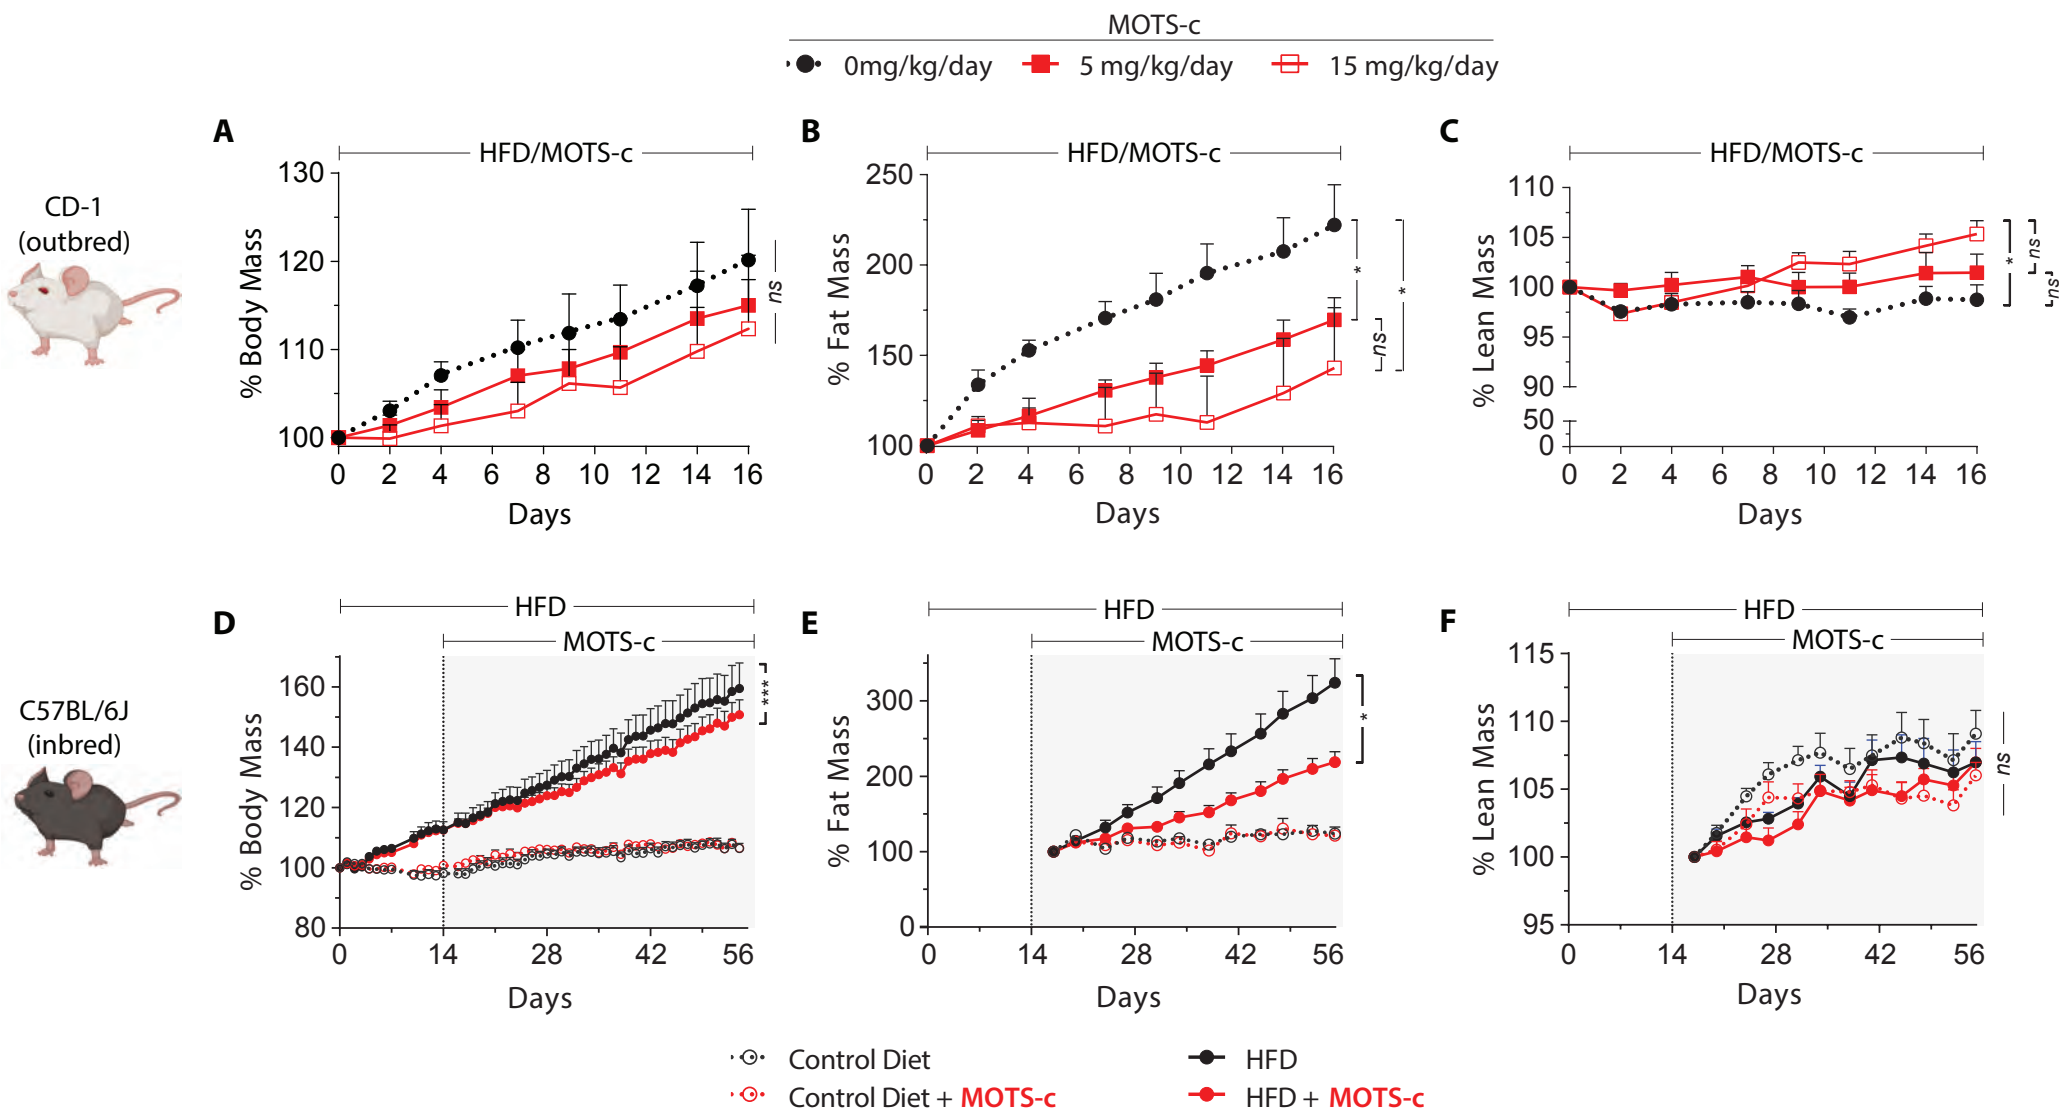

**Fig. S5. Body composition analysis on MOTS-c-treated young mice.** Body composition was measured non-invasively using a time-domain NMR analyzer. **(A-C)** Young CD-1 mice were treated daily with MOTS-c (0, 5, or 15 mg/kg/day;IP) for 16 days (n=5-6) and percent **(A)** body weight, **(B)** fat mass, and **(C)** lean muscle mass were measured. **(D-F)** C57BL/6J mice either on a HFD or a defined control diet and treated daily with MOTS-c (15 mg/kg/day; IP) or saline control (n=8) and percent **(D)** body weight, **(E)** fat mass, and **(F)** lean muscle mass were measured. The dotted line at Day 14 represents the start of MOTS-c treatment. Data expressed as mean +/- SEM. Significance determined by using two-way ANOVA (repeated measures). \*P<0.05, \*\*P<0.01, \*\*\*P<0.001.

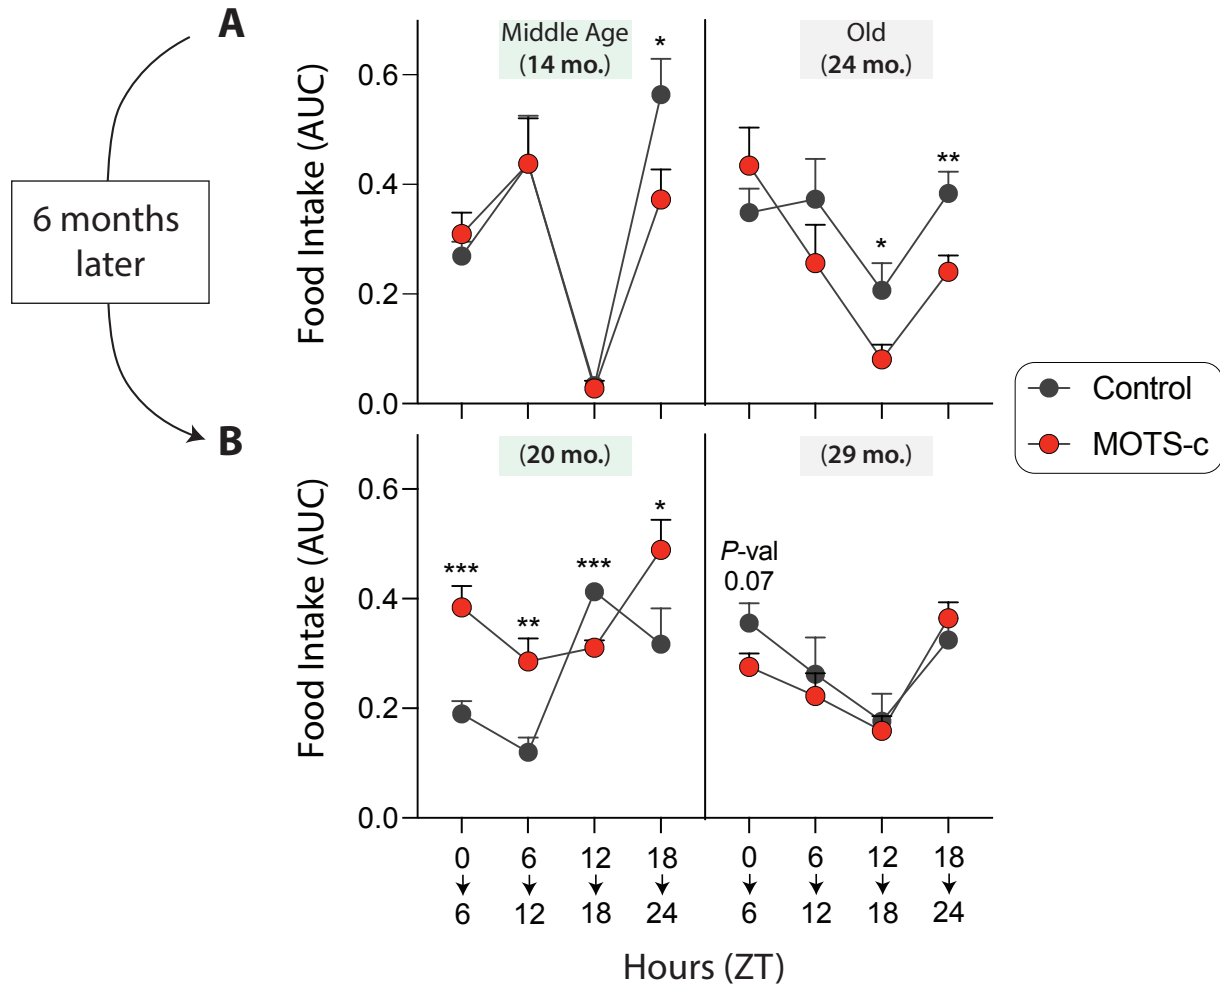

**Fig. S6. Circadian pattern of food intake in MOTS-c-treated old mice.** (A) The sum of continuous food intake measurements using metabolic cages divided into daily quartiles in MOTS-c-treated middle-age (14 months) and old (24 months) mice (n=4). (B) Measurements were taken 6 month later in same mice. Data expressed as mean +/- SEM. Student's t-test. \*P<0.05, \*\*P<0.01, \*\*\*P<0.001.

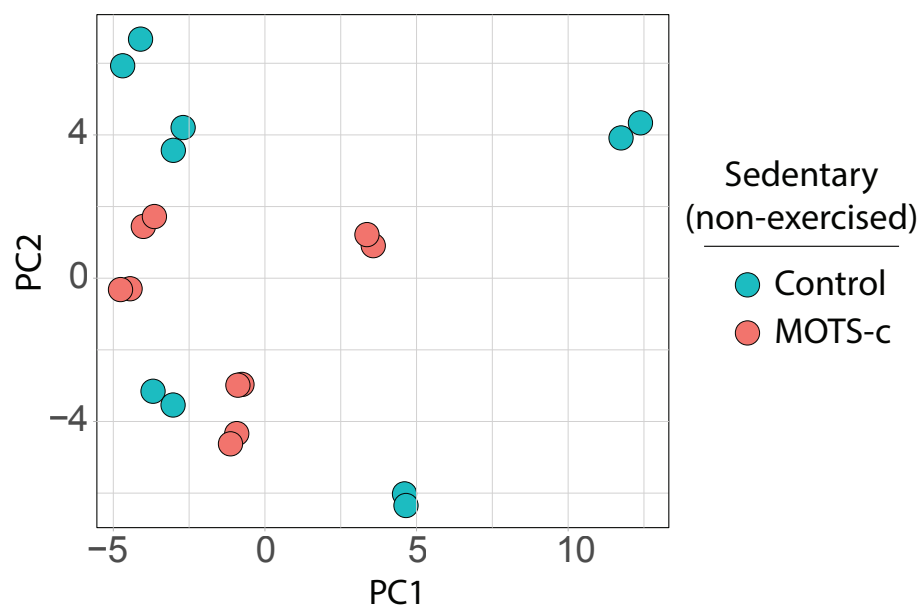

**Fig. S7. Metabolomic analysis on sedentary MOTS-c-treated old mice.** Skeletal muscle from sedentary (not treadmill-exercised) old mice (22.5 months) treated daily with MOTS-c (15 mg/kg/day) for 2 weeks (n=10) were subject to metabolomics and analyzed using PCA.

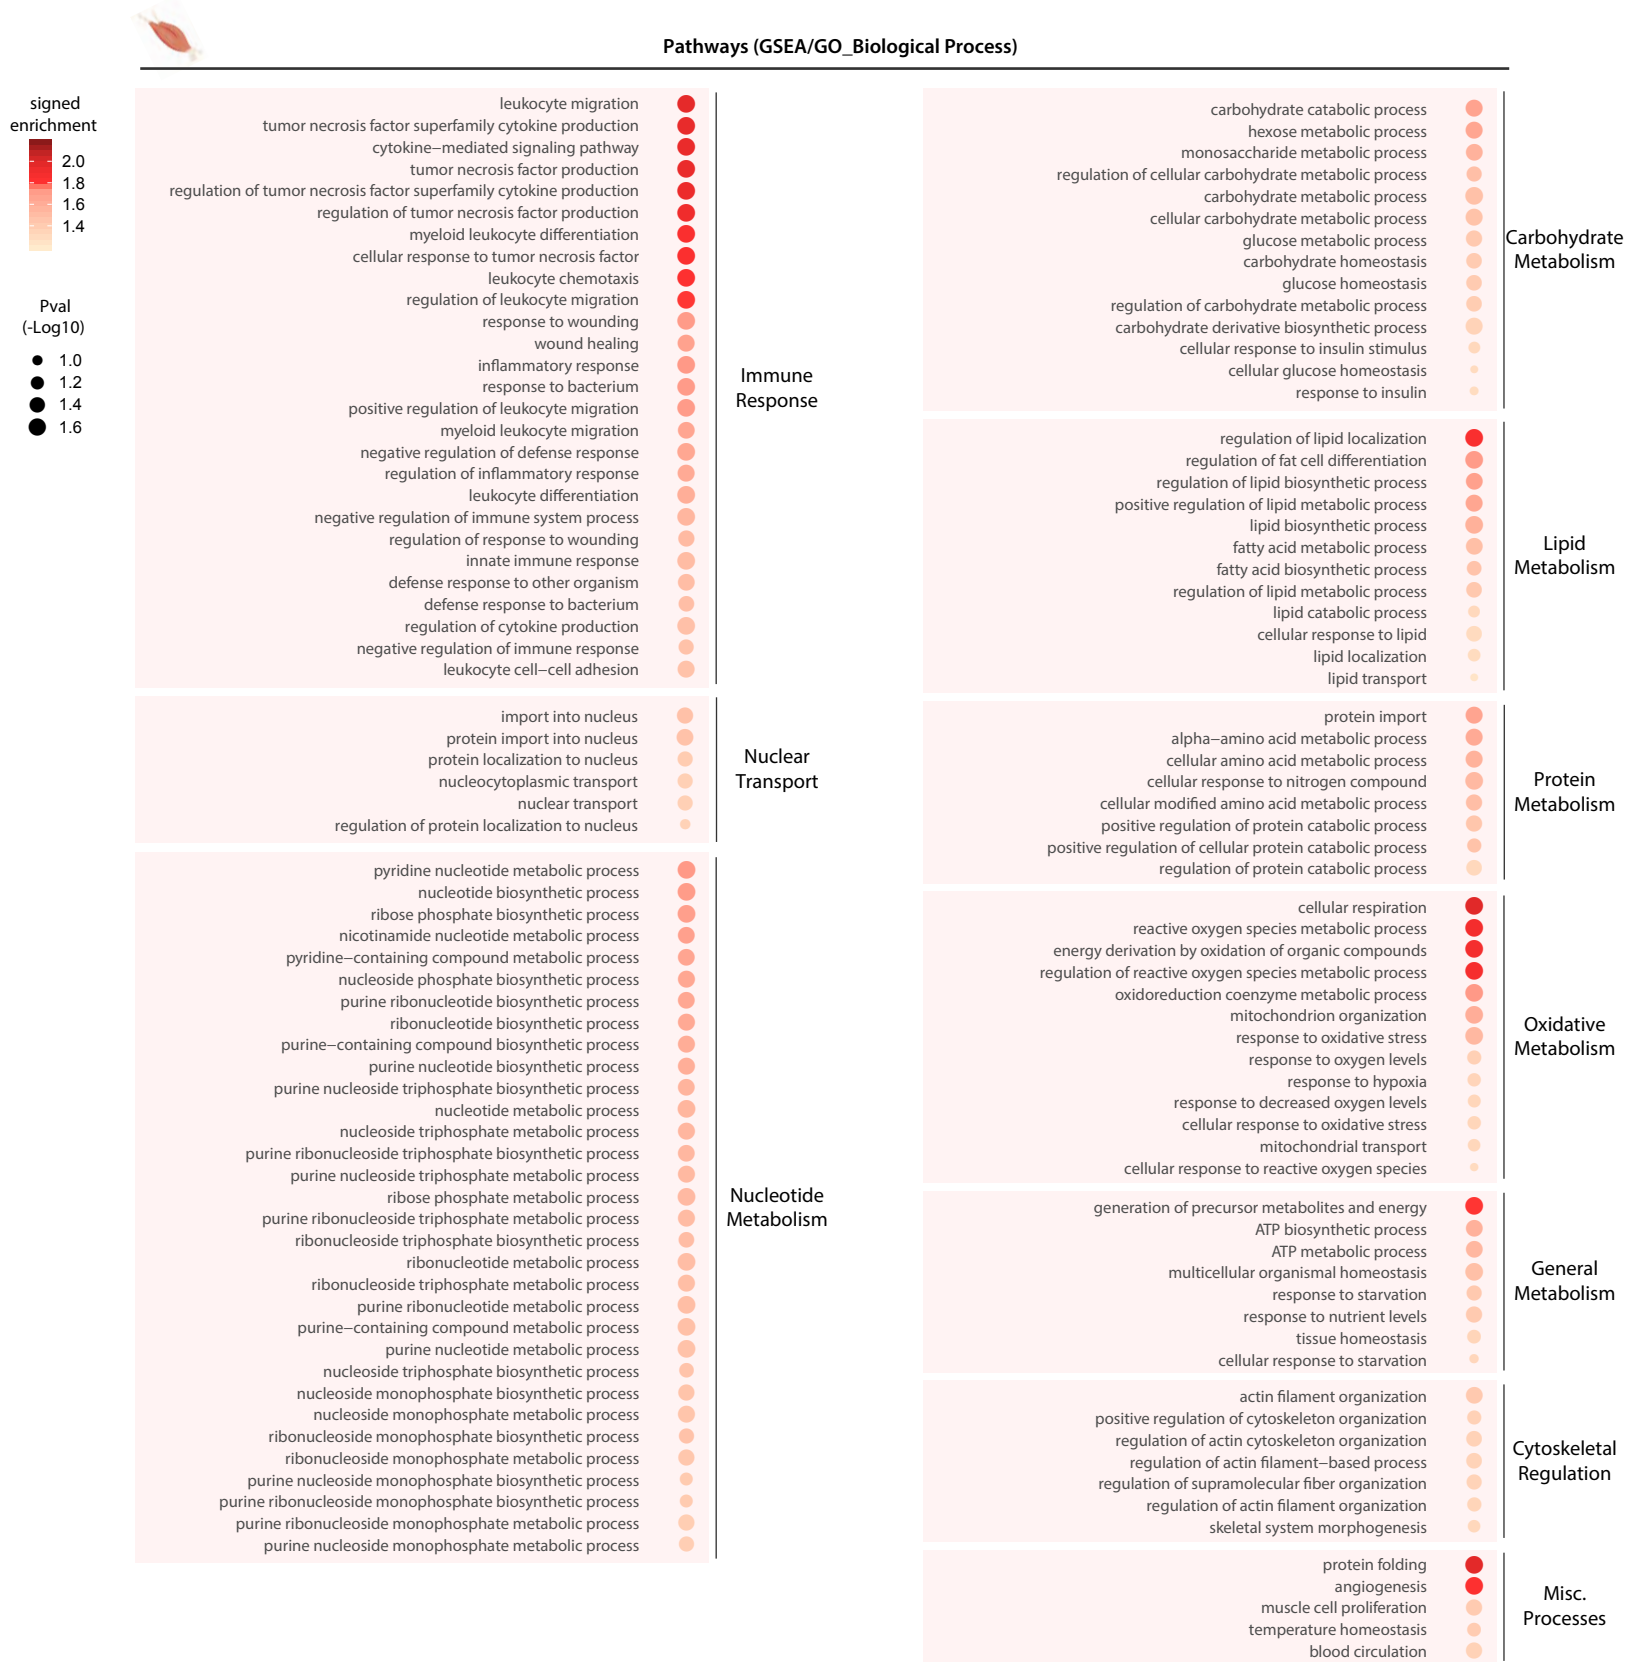

**Fig. S8. Gene expression analysis on skeletal muscle from exercised MOT5-c-treated old mice.** RNA-seq was performed on skeletal muscles from MOT5-c-treated old mice. Balloon plots of biological processes derived from Gene Set Enrichment Analysis (GSEA) using the Gene Ontology (Biological Process) database at a false discovery rate (FDR) < 15% (n=6).

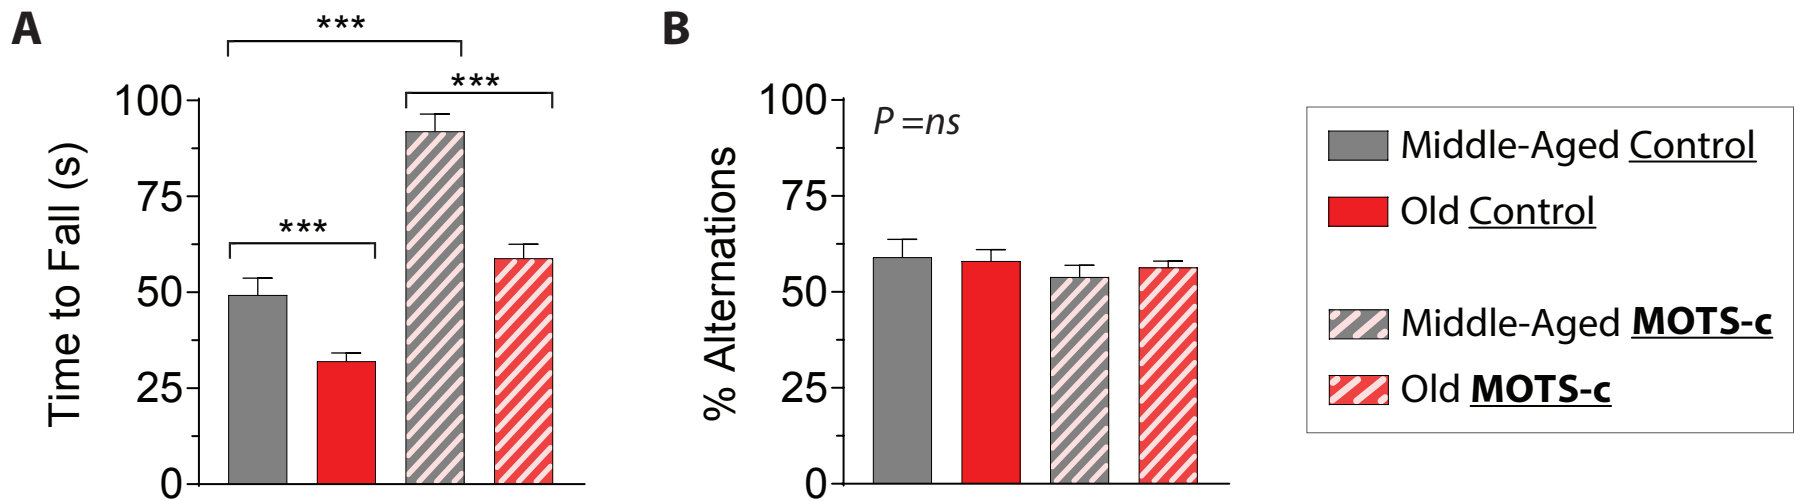

**Fig. S9. Rotarod and Y-Maze tests in MOTS-c-treated old mice.** Middle-aged (14 mo.; n=5-6) and old (24 mo.; n=17-19) mice were treated daily with MOTS-c (15 mg/kg/day; IP) and subject to **(A)** a rotarod test and **(B)** Y- maze test. Data expressed as mean +/- SEM. Student's t-test. \*\*\*P<0.001.

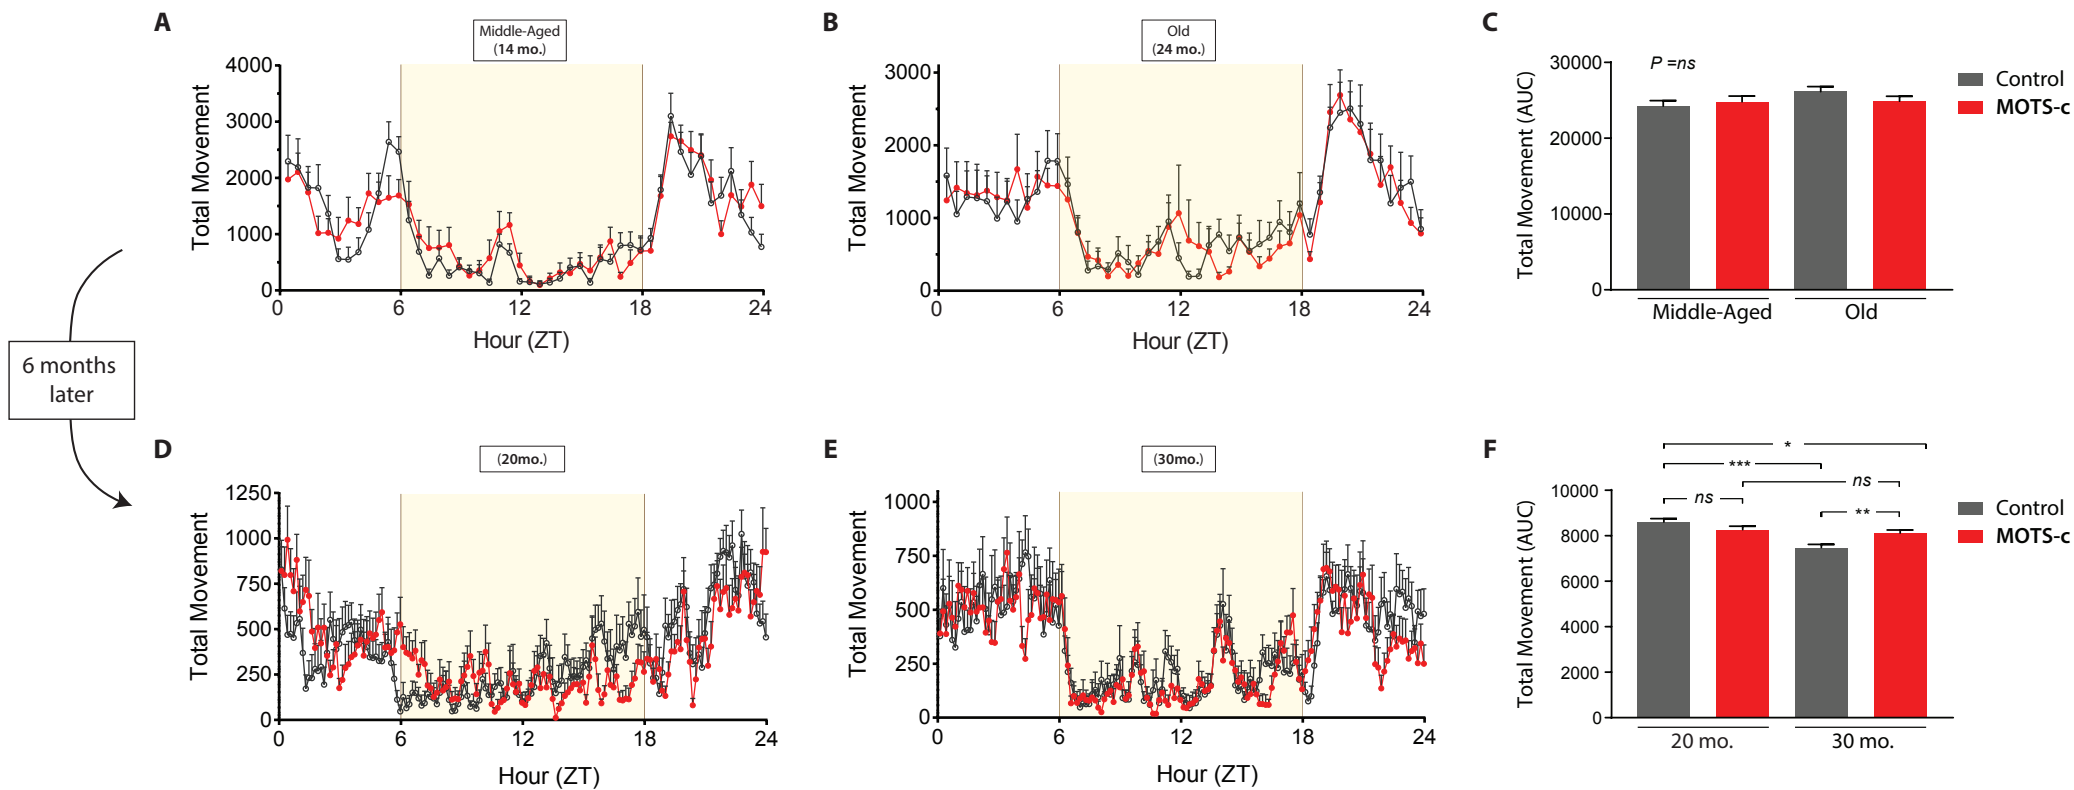

**Fig. S10. Total physical activity in MOTS-c-treated old mice.** Total movement [horizontal and vertical movement (XYZ-axis)] of MOTS-c-treated (A) middle-aged (14 mo.) and (B) old (24 mo.) mice were continuously measured using metabolic cages throughout the day for three days ( $n=4$ ). (C) The sum of all measured movements is shown. (D-F) The procedure was repeated on the same mice after 6 months of LLII MOTS-c treatment. Data expressed as mean  $\pm$  SEM of three 24-hour acquisition cycles. Student's t-test. \* $P < 0.05$ , \*\* $P < 0.01$ , \*\*\* $P < 0.001$ .

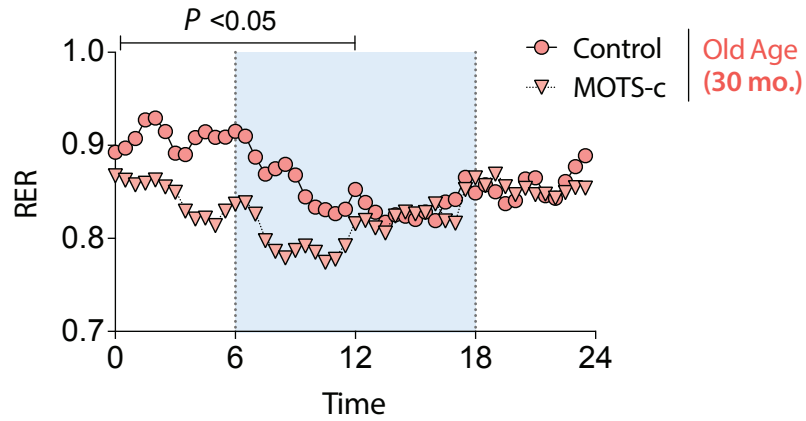

**Fig. S11. MOTS-c-dependent circadian fuel selection old mice.** Respiratory Exchange Ratio (RER) measurements in LLII MOTS-c-treated, or control, old mice (30 mo.; n=4). Shaded region represents daytime (light cycle). Data expressed as mean  $\pm$  SEM of three 24-hour acquisition cycles. Two-way ANOVA (repeated measures).



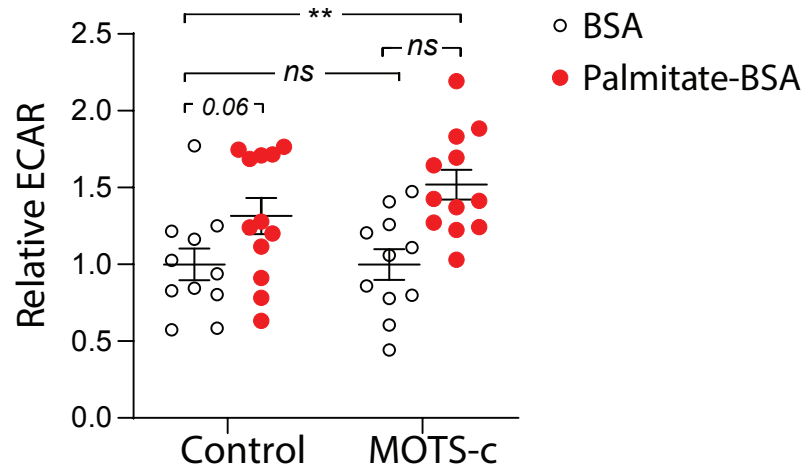

**Fig. S12. MOTS-c-dependent glycolytic rate in lipid-stimulated mouse myoblasts.** C2C12 mouse myoblasts were treated with MOTS-c (10 $\mu$ M) or saline control in nutrient-limited media (n=11-12). Real-time glycolytic flux determined by the extracellular acidification rate was measured using the XF96 Seahorse bioanalyzer. Prior to the start of the assay, nutrient-deprived cells were given either BSA alone or palmitate bound to BSA (palmitate-BSA) to determine the capacity to metabolize fatty acids. Data expressed as mean  $\pm$  SEM. Student's t-test. \*P<0.05, \*\*P<0.01, \*\*\*P<0.001.

signed enrichment

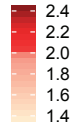

Pval  
(-Log10)

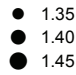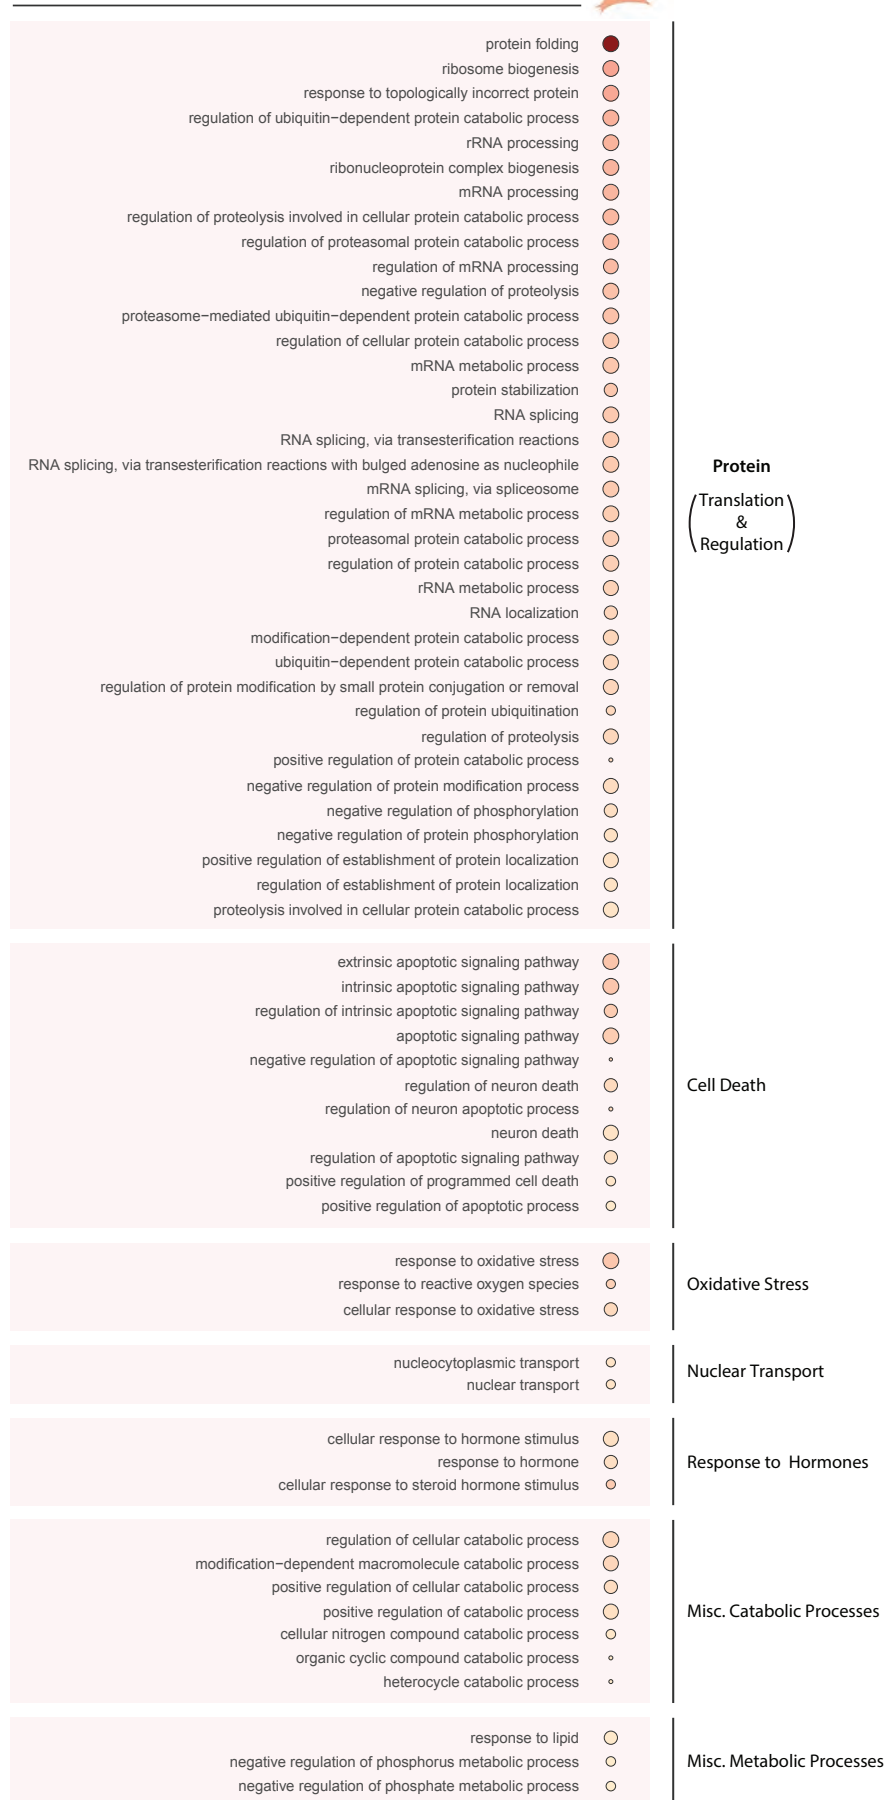

**Fig. S13. Gene expression analysis on MOTS-c-treated mouse myoblasts under metabolic stress.** RNA-seq was performed on C2C12 myoblasts following 48 hours of GR/SD with MOTS-c (10µM) treatment only once initially (n=6). Balloon plots of biological processes derived from Gene Set Enrichment Analysis (GSEA) using the Gene Ontology (Biological Process) database at a false discovery rate (FDR) < 15% (n=6).
